# Supplementary material for: Endocrine Dysfunction Criteria in Critically Ill Children: The PODIUM Consensus Conference
Source: Oxford University Press journal article supplement (doi:10.1542/peds.2021-052888m), 2021-12-31
Supplement: peds_2021052888msupplementarydata.pdf [file peds_2021052888msupplementarydata.pdf]

## Endocrine Dysfunction Criteria in Critically Ill Children:

### The PODIUM Consensus Conference

Vijay Srinivasan, MBBS MD FCCM<sup>1</sup>; Jan Hau Lee MBBS MRCPCH MCI<sup>2</sup>; Kusum Menon MD MSc<sup>3</sup>, Jerry J Zimmerman MD PhD<sup>4</sup>,  
Melania M Bembea MD MPH PhD<sup>5</sup>, Michael SD Agus MD<sup>6</sup>

### Data Supplement

#### Table of Contents

| Content                                                                                                                                                       | Pages |
|---------------------------------------------------------------------------------------------------------------------------------------------------------------|-------|
| <b>Supplemental Figure 1.</b> Risk of Bias Assessment Summary for Studies Included in the PODIUM Endocrine Dysfunction Systematic Review (n= 121 studies)     | 2     |
| <b>Supplemental Table 1.</b> Studies Included in the PODIUM Endocrine Dysfunction Systematic Review (n=121 studies)                                           | 3-13  |
| <b>Supplemental Table 2.</b> Performance Characteristics for Assessment Tools and Scores for Endocrine Dysfunction in Critically Ill Children (n=121 studies) | 14-28 |
| <b>References</b>                                                                                                                                             | 29-35 |
| <b>Research Priorities</b>                                                                                                                                    | 36    |

**Supplemental Figure 1.** Risk of Bias Assessment Summary for Studies Included in the PODIUM Endocrine Dysfunction Systematic Review (n= 121 studies)

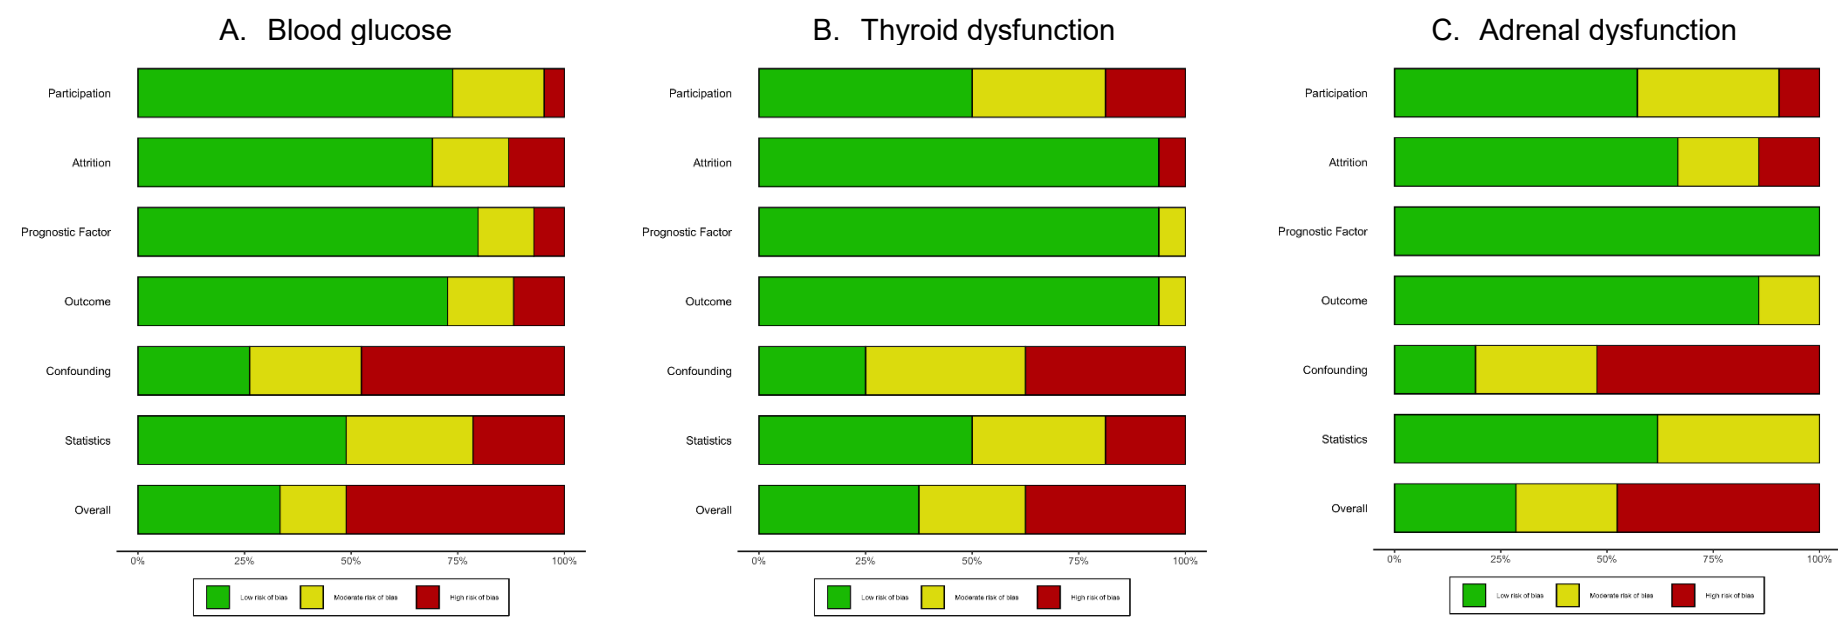

**Supplemental Table 1. Studies Included in the PODIUM Endocrine Dysfunction Systematic Review (n=121 studies)**

| Author (yr)                                   | Funding | Study design                                            | Location      | No. of sites | Study years | Setting                      | Data source(s)                                                                                            | Sample size                                                            | Recruitment            | Age categories <sup>a</sup>                    | Age details <sup>b</sup>                                                 |
|-----------------------------------------------|---------|---------------------------------------------------------|---------------|--------------|-------------|------------------------------|-----------------------------------------------------------------------------------------------------------|------------------------------------------------------------------------|------------------------|------------------------------------------------|--------------------------------------------------------------------------|
| <b>A. Abnormal glucose homeostasis (n=84)</b> |         |                                                         |               |              |             |                              |                                                                                                           |                                                                        |                        |                                                |                                                                          |
| Agbenyega (2000)                              | NGO     | Non-randomized/quasi randomized controlled trial        | Ghana         | 1            | 1995-1995   | NR/Unable to determine       | Prospective data collection                                                                               | 21                                                                     | NR/Unable to determine | Children                                       | Ages only provided for individual groups, not total cohort.              |
| Alaei (2012)                                  | NR      | Prospective cohort, Observational/descriptive study     | Iran          | 1            | 2010-2010   | PCICU (cardiac only)         | Prospective data collection                                                                               | 379                                                                    | Consecutive            | Neonates<br>Infants<br>Children<br>Adolescents | Mean patient age was 52.09 ± 45.91 months (range, 0.2-180 months)        |
| Al-Moffada (2001)                             | NR      | Retrospective cohort                                    | Saudi Arabia  | 1            | 1988-1998   | PICU of unknown composition  | Chart review                                                                                              | 28                                                                     | Consecutive            | Children<br>Adolescents                        | Mean or median is not provided but state 79% were under 6 years of age   |
| Asilioglu (2011)                              | NR      | Retrospective cohort                                    | Turkey        | 1            | 2005-2009   | PICU of unknown composition  | Chart review                                                                                              | 65                                                                     | Consecutive            | Children<br>Adolescents                        | Mean age 48 months (3 months-18 years)                                   |
| Babbitt (2013)                                | NR      | Case/control study (case matched), Retrospective cohort | United States | 1            | NR          | PICU of unknown composition  | Chart review                                                                                              | 88                                                                     | Consecutive            | Infants<br>Children                            | 7.7 +/- 7.9 mths in the study group; 10.7 +/- 10.6 months in the control |
| Bahloul (2009)                                | NR      | Retrospective cohort                                    | Tunisia       | 1            | 1997-2004   | Other (Medico-surgical PICU) | Chart review                                                                                              | 222                                                                    | Consecutive            | Children<br>Adolescents                        | Mean age of 7.54 3.8 years (range 0.3-15 years)                          |
| Ballweg (2007)                                | NR      | Retrospective cohort                                    | United States | 1            | NR          | PCICU (cardiac only)         | Prospective data collection, Other (Review of data base of previous prospective descriptive cohort study) | Of 247 who underwent surgery, neurodevelopmental data available on 188 | Consecutive            | Neonates<br>Infants                            | 1.01 +/- 0.03 yr; surgery during infancy; follow-up one year later       |
| Ballweg (2009)                                | NR      | Retrospective cohort                                    | United States | 1            | 1998-2003   | PCICU (cardiac only)         | Other (Database from previous prospective cohort study)                                                   | 85 of 162 patients with complete                                       | Consecutive            | Neonates<br>Infants                            | 1.01 +/- 0.03 yr; surgery during infancy; follow-up one year later       |

|                  |                     |                                                            |            |   |           |                                                                                                                              |                                              |                                                                                    |                        |                                    |                                                                                   |
|------------------|---------------------|------------------------------------------------------------|------------|---|-----------|------------------------------------------------------------------------------------------------------------------------------|----------------------------------------------|------------------------------------------------------------------------------------|------------------------|------------------------------------|-----------------------------------------------------------------------------------|
|                  |                     |                                                            |            |   |           |                                                                                                                              |                                              | e data<br>availabl<br>e                                                            |                        |                                    |                                                                                   |
| Bhutia (2013)    | NR                  | Prospective cohort                                         | India      | 1 | 2009-2010 | PICU (non-cardiac only)                                                                                                      | Prospective data collection                  | 170                                                                                | Consecutive            | Infants<br>Children<br>Adolescents | NR                                                                                |
| Branco (2005)    | NR                  | Prospective cohort                                         | Brazil     | 1 | 2001-2003 | PICU of unknown composition                                                                                                  | Prospective data collection                  | 57                                                                                 | NR/Unable to determine | NR/Unable to determine             | 33.8 +/- 50.9 months                                                              |
| Burns (2008)     | Govt.,<br>NGO       | Prospective cohort,<br>Retrospective cohort                | England    | 2 | 1992-2006 | NR/Unable to determine                                                                                                       | Chart review,<br>Prospective data collection | 264 (35 with symptomatic hypoglycemia and 229 neurodevelopmentally normal infants) | NR/Unable to determine | Neonates                           | Median gestational age in the cases was 39.5 weeks and 39 weeks in the controls.  |
| Chiaretti (2002) | NR                  | Retrospective cohort                                       | Italy      | 1 | 1992-2000 | PICU of unknown composition                                                                                                  | Chart review                                 | 122                                                                                | Consecutive            | Infants<br>Children<br>Adolescents | Mean age at the time of head injury was 122.7±45.9 months                         |
| Chiaretti (1998) | NR                  | Retrospective cohort                                       | Italy      | 1 | 1993-1996 | PICU of unknown composition                                                                                                  | Chart review                                 | 53                                                                                 | Consecutive            | Infants<br>Children<br>Adolescents | Ranging in age between 2 months and 17 years (mean 6.04±4.98 years)               |
| Chisti (2010)    | NGO                 | Retrospective cohort                                       | Bangladesh | 1 | 2005-2006 | Other (Special Care Ward)                                                                                                    | Chart review                                 | 61                                                                                 | Consecutive            | Neonates                           | The paper just refers to infants and babies but does not provide further details. |
| Chisti (2010)    | Govt.               | Case/control study (case matched),<br>Retrospective cohort | Bangladesh | 1 | 2005-2006 | PICU (non-cardiac only),<br>Other (Special Care Ward (different terms used but described as patients requiring ICU support)) | Chart review                                 | 90                                                                                 | Consecutive            | Neonates                           | Not available                                                                     |
| Chong (2015)     | Other (Nil funding) | Retrospective cohort                                       | Singapore  | 1 | 2003-2013 | Mixed PICU (cardiac                                                                                                          | Chart review                                 | 56                                                                                 | Consecutive            | Infants<br>Children                | Median 8.6 (5, 11)                                                                |

|                    |                                   |                                                        |                                                  |    |           |                                                              |                             |     |                        |                                                |                                                                               |
|--------------------|-----------------------------------|--------------------------------------------------------|--------------------------------------------------|----|-----------|--------------------------------------------------------------|-----------------------------|-----|------------------------|------------------------------------------------|-------------------------------------------------------------------------------|
|                    |                                   |                                                        |                                                  |    |           | and non-cardiac), ER                                         |                             |     |                        | Adolescents                                    |                                                                               |
| Cochran (2003)     | NR                                | Retrospective cohort                                   | United States                                    | 1  | 2000-2000 | PICU of unknown composition , Hospital floor outside the ICU | Chart review                | 123 | Consecutive            | Neonates<br>Infants<br>Children<br>Adolescents | Median 4 years (IQR not described)                                            |
| Day (2008)         | NR                                | Retrospective cohort                                   | England                                          | 1  | 2001-2004 | Mixed PICU (cardiac and non-cardiac)                         | Chart review                | 97  | Consecutive            | Neonates<br>Infants<br>Children<br>Adolescents | 2.1 [7.2-4.7] IQR years                                                       |
| DeCampi (2010)     | NGO                               | Retrospective cohort                                   | United States                                    | 1  | 2006-2007 | PCICU (cardiac only), Operating room (OR)                    | Chart review                | 144 | Consecutive            | Neonates<br>Infants<br>Children                | Not available                                                                 |
| deFerranti (2004)  | NR                                | Secondary analysis of RCTs, Prospective cohort         | United States                                    | 1  | 1988-1992 | Operating room (OR)                                          | Chart review                | 171 | Consecutive            | Neonates<br>Infants                            | Median 6 (IGR 1-67) days                                                      |
| Egi (2008)         | Govt.                             | Retrospective cohort                                   | Japan                                            | 1  | 2003-2005 | PCICU (cardiac only)                                         | Chart review                | 40  | Convenience            | Neonates<br>Infants<br>Children                | Not states                                                                    |
| El-Sherbini (2018) | NR                                | Prospective cohort                                     | Egypt                                            | 1  | 2014-2014 | PICU of unknown composition                                  | Prospective data collection | 60  | NR/Unable to determine | Infants<br>Children<br>Adolescents             | Median 1.5 years [range 1.9 months to 11 years]                               |
| Falcao (2008)      | NR                                | Retrospective cohort                                   | United States                                    | 1  | 2006-2006 | Mixed PICU (cardiac and non-cardiac)                         | Chart review                | 213 | Consecutive            | Neonates<br>Infants<br>Children                | Median 3.62 months (IQR 0.69 - 27.79)                                         |
| Faustino (2005)    | NR                                | Retrospective cohort                                   | United States                                    | 1  | 2000-2003 | PICU of unknown composition                                  | Chart review                | 942 | Convenience            | Neonates<br>Infants<br>Children<br>Adolescents | Median 3.2 years (IQR 0.3 - 10.8 years)                                       |
| Faustino (2019)    | Govt.                             | Secondary analysis of RCTs                             | United States, Canada, United Kingdom, Australia | 35 | 2012-2016 | PICU (non-cardiac only)                                      | Prospective data collection | 698 | Random                 | Infants<br>Children<br>Adolescents             | Cases: median 3.6 yrs (IQR 0.9-10.4); Controls: median 4.4 yrs (IQR 1.3-11.7) |
| Filho (2016)       | NR                                | Retrospective cohort                                   | Brazil                                           | 1  | 2005-2010 | NR/Unable to determine                                       | Chart review                | 105 | Consecutive            | Children<br>Adolescents                        | Age, yrs 8 (IQR:4-12)                                                         |
| Fu (2019)          | Other (Authors reported receiving | Retrospective cohort, Observational/ descriptive study | China                                            | 1  | 2012-2018 | PICU (non-cardiac only)                                      | Chart review                | 213 | Convenience            | Children<br>Adolescents                        | 52.0 months (IQR: 20.5-86.5)                                                  |

|                    |                       |                                                                  |               |    |           |                                                |                                         |                                            |                                                                                 |                                                |                                                                                                                                          |
|--------------------|-----------------------|------------------------------------------------------------------|---------------|----|-----------|------------------------------------------------|-----------------------------------------|--------------------------------------------|---------------------------------------------------------------------------------|------------------------------------------------|------------------------------------------------------------------------------------------------------------------------------------------|
|                    | no funding for study) |                                                                  |               |    |           |                                                |                                         |                                            |                                                                                 |                                                |                                                                                                                                          |
| Fu (2017)          | Other (Nil funding)   | Retrospective cohort                                             | China         | 1  | 2012-2014 | Mixed PICU (cardiac and non-cardiac)           | Chart review                            | 109                                        | Consecutive                                                                     | Infants<br>Children<br>Adolescents             | Median 54 (17-82) months                                                                                                                 |
| Ghafoori (2008)    | NR                    | Case/control study, Retrospective cohort                         | United States | 1  | 2001-2005 | PCICU (cardiac only)                           | Chart review                            | 24                                         | Other (Infants and children with mediastinitis after CHD surgery)               | Neonates<br>Infants<br>Children<br>Adolescents | 7.0 ± 10.9 in mediastinitis group                                                                                                        |
| Gottschlich (2002) | NGO                   | Randomized controlled trial (RCT), Cross-over RCT, Pragmatic RCT | United States | 1  | 1991-2001 | PICU of unknown composition                    | Prospective data collection             | 72                                         | Consecutive                                                                     | Neonates<br>Infants<br>Children                | Not stated                                                                                                                               |
| Graf (1995)        | NR                    | Retrospective cohort                                             | United States | 1  | 1980-1991 | PICU (non-cardiac only), Other (General wards) | Chart review                            | 194                                        | Consecutive                                                                     | Neonates<br>Infants<br>Children<br>Adolescents | Median 2.6 years (range 5 months - 18 years)                                                                                             |
| Hale (2018)        | NR                    | Retrospective cohort, observational/descriptive study            | United States | 1  | 2006-2013 | NR/Unable to determine                         | Registry                                | 1814                                       | Other (Children with Trauma Registry data meeting inclusion/exclusion criteria) | Neonates<br>Infants<br>Children<br>Adolescents | 6.17 ± 5.96, seizure group; (n=121) 7.67 ± 5.66, no seizure group (n=1693)                                                               |
| Hirshberg (2008)   | NGO                   | Retrospective cohort                                             | United States | 1  | 2003-2003 | Mixed PICU (cardiac and non-cardiac)           | Chart review                            | 863                                        | Consecutive                                                                     | Neonates<br>Infants<br>Children<br>Adolescents | Median 2 years (IQR 0.4, 7.1 years)                                                                                                      |
| Hu (2017)          | Govt.                 | Case/control study (case matched)                                | China         | 1  | 2010-2016 | NR/Unable to determine                         | NR/Unable to determine                  | 296                                        | NR/Unable to determine                                                          | Children<br>Adolescents                        | Mean 8.11 yrs, SD 3.21                                                                                                                   |
| Hu (2018)          | Govt.                 | Case/control study (case matched), Retrospective cohort          | China         | 1  | 2013-2016 | NR/Unable to determine                         | Chart review, EMR query, Registry       | 111 AKI patients with 111 matched controls | Consecutive                                                                     | Infants<br>Children                            | Not provided for whole cohort, only for those with and without AKI. Age at surgery (mo), median (IQR): no AKI, 36 (12,72); AKI 12 (4,45) |
| Huang (2012)       | NR                    | Retrospective cohort                                             | China         | 1  | 2010-2010 | Mixed PICU (cardiac and non-cardiac)           | Chart review, Other (Existing database) | 233                                        | NR/Unable to determine                                                          | Neonates<br>Infants                            | Median 5 months (IQR 3-7)                                                                                                                |
| Ichikawa (2017)    | NR                    | Retrospective cohort                                             | Japan         | 22 | 2004-2011 | NR/Unable to determine                         | Registry                                | 119                                        | Consecutive                                                                     | Neonates<br>Infants<br>Children<br>Adolescents | Mean 8 years, SD 4.6 years                                                                                                               |
| Jallow (2012)      | Govt. NGO             | Prospective cohort                                               | The Gambia    | 1  | 1997-2009 | Hospital floor                                 | Prospective data collection             | 2901                                       | NR/Unable to determine                                                          | Infants<br>Children                            | Median 45 months [IQR 27-71]                                                                                                             |

|                |                              |                                                      |               |   |           |                                      |                             |      |                        |                                       |                                                                                                                                |
|----------------|------------------------------|------------------------------------------------------|---------------|---|-----------|--------------------------------------|-----------------------------|------|------------------------|---------------------------------------|--------------------------------------------------------------------------------------------------------------------------------|
|                |                              |                                                      |               |   |           | outside the ICU                      |                             |      |                        | Adolescents                           |                                                                                                                                |
| Jeschke (2014) | Govt. NGO                    | Prospective cohort                                   | United States | 1 | NR        | Other (Burns PICU)                   | Prospective data collection | 230  | NR/Unable to determine | NR/Unable to determine                | Mean 7.3 years; SD 5.5                                                                                                         |
| Jeschke (2010) | Govt. NGO                    | Secondary analysis of RCTs                           | United States | 1 | 2002-2009 | Other (Burns PICU)                   | Prospective data collection | 208  | Random                 | NR/Unable to determine                | Mean 9 years, SD 6 yrs                                                                                                         |
| Kan (2009)     | NR                           | Cross-sectional study                                | Malaysia      | 1 | 2001-2006 | Other (Neurosurgical ICU)            | Chart review                | 146  | NR/Unable to determine | Children Adolescents                  | Mean 11.7 years, SD 4.2 yrs                                                                                                    |
| Khajavi (2018) | NR                           | Retrospective cohort                                 | Iran          | 1 | 2012-2015 | PICU (non-cardiac only)              | Chart review, EMR query     | 201  | Consecutive            | Neonates Infants Children             | Mean 3.16 months; SD 8.95                                                                                                      |
| Khan (2015)    | NR                           | Cross-sectional study                                | Pakistan      | 1 | 2011-2012 | NR/Unable to determine               | Chart review                | 150  | Convenience            | Infants Children Adolescents          | Median 24 months (range: 1-147 months)                                                                                         |
| Klein (2008)   | Other (No source of funding) | Retrospective cohort                                 | United States | 1 | 2001-2005 | PICU (non-cardiac only)              | Registry                    | 1550 | Consecutive            | Neonates Infants Children Adolescents | Mean, 83.5 months; median, 49.7 months                                                                                         |
| Kraft (2014)   | Govt. NGO                    | Secondary analysis of RCTs                           | United States | 1 | 2002-2008 | Other (Burns PICU)                   | Prospective data collection | 106  | Random                 | Neonates Infants Children Adolescents | Mean 9.3 years, SD 4.9 yrs                                                                                                     |
| Krueger (2015) | NGO                          | Prospective cohort, Observational/ descriptive study | Switzerland   | 1 | 2007-2008 | PICU of unknown composition          | Prospective data collection | 150  | Consecutive            | Neonates Infants                      | Mean age at surgery was 2.8 months (0.1-10.7 months). Then Children were examined at a mean age of 4.3 years (3.8- 4.7 years). |
| Kyle (2010)    | NR                           | Retrospective cohort                                 | United States | 1 | 2005-2006 | PICU of unknown composition          | Chart review                | 110  | NR/Unable to determine | Neonates Infants Children Adolescents | Median 11.2 years (Range 0.1 – 21.3)                                                                                           |
| Lee (2016)     | Govt. NGO                    | Prospective cohort                                   | China         | 1 | 2011-2012 | PICU of unknown composition          | Prospective data collection | 295  | Consecutive            | Infants Children                      | Mean 2.06 years, SD 0.08 years                                                                                                 |
| Leite (2013)   | Govt.                        | Prospective cohort                                   | Brazil        | 1 | 2006-2008 | Mixed PICU (cardiac and non-cardiac) | Prospective data collection | 221  | Consecutive            | Infants Children Adolescents          | Median 2.3 years (IQR: 0.6-13.5)                                                                                               |
| Li (2015)      | NR                           | Retrospective cohort                                 | China         | 1 | 2008-2011 | PICU (non-cardiac only)              | Chart review                | 1349 | Consecutive            | Neonates Infants Children Adolescents | NR                                                                                                                             |

|                  |                                                                 |                                                        |                |    |           |                                                                                              |                                           |      |                        |                                                |                                                                                               |
|------------------|-----------------------------------------------------------------|--------------------------------------------------------|----------------|----|-----------|----------------------------------------------------------------------------------------------|-------------------------------------------|------|------------------------|------------------------------------------------|-----------------------------------------------------------------------------------------------|
| Lodha (2009)     | NR                                                              | Retrospective cohort                                   | India          | 1  | NR        | PICU (non-cardiac only)                                                                      | Chart review                              | 209  | NR/Unable to determine | Infants<br>Children<br>Adolescents             | N/A                                                                                           |
| Lou (2010)       | NR                                                              | Retrospective cohort                                   | China          | 1  | 2009-2009 | PCICU (cardiac only)                                                                         | Chart review                              | 100  | Consecutive            | Neonates<br>Infants                            |                                                                                               |
| Maegaki (2015)   | Govt.                                                           | Retrospective cohort                                   | Japan          | 25 | 2005-2010 | PICU of unknown composition , ER                                                             | Registry                                  | 201  | Consecutive            | Infants<br>Children<br>Adolescents             | 1-12m, 29/201; 13-24m, 48/201; 25-48m, 63/201; 49-188m, 61/201                                |
| Mahmoud (2018)   | NR                                                              | Prospective cohort                                     | Egypt          | 1  | 2015-2016 | NR/Unable to determine                                                                       | Chart review, Prospective data collection | 105  | NR/Unable to determine | Infants<br>Children<br>Adolescents             | Mean 38.71 months; SD 48.6                                                                    |
| Marsillio (2015) | NGO                                                             | Retrospective cohort                                   | United States  | 1  | 2008-2012 | Mixed PICU (cardiac and non-cardiac)                                                         | Chart review                              | 116  | Consecutive            | Neonates<br>Infants<br>Children<br>Adolescents | Median 0.8 years (0.1-3.8 years)                                                              |
| Marton (2007)    | NR                                                              | Retrospective cohort                                   | Italy          | 1  | 1986-2006 | PICU (non-cardiac only)                                                                      | Chart review                              | 16   | Consecutive            | Neonates<br>Infants                            | Mean 7 m, range 3-12 m                                                                        |
| Melo (2010)      | Govt.                                                           | Retrospective cohort                                   | France         | 1  | 2000-2005 | PICU (non-cardiac only)                                                                      | Chart review                              | 286  | Consecutive            | Neonates<br>Infants<br>Children<br>Adolescents | Mean 7y (SD, 4.4y)                                                                            |
| Melo (2009)      | NGO                                                             | Cross-sectional study                                  | France         | 1  | 2000-2005 | PICU (non-cardiac only)                                                                      | Chart review                              | 58   | Consecutive            | Neonates<br>Infants<br>Children                | Mean 2.8y (SD, 1.4y)                                                                          |
| Moga (2011)      | Other (Department of Critical Care, Hospital for Sick Children) | Retrospective cohort, Observational/ descriptive study | Canada         | 1  | 2006-2007 | PCICU (cardiac only)                                                                         | Chart review                              | 772  | Consecutive            | Neonates<br>Infants<br>Children<br>Adolescents | NR                                                                                            |
| Nagao (2008)     | Govt.                                                           | Retrospective cohort                                   | Japan          | >4 | 1998-2002 | PICU of unknown composition , Hospital floor outside the ICU, ER, Other (Pediatric practice) | Other (Survey to sites)                   | 184  | Convenience            | Neonates<br>Children<br>Adolescents            | Unable to determine for the sample included in the multivariable logistic regression analysis |
| Narci (2009)     | NR                                                              | Retrospective cohort                                   | Turkey         | 1  | 2006-2008 | ER                                                                                           | Chart review                              | 74   | Consecutive            | Children<br>Adolescents                        | Mean 7.0y (SD, 4.34)                                                                          |
| Nayak (2013)     | NGO                                                             | Retrospective cohort                                   | United Kingdom | 1  | 2003-2006 | Mixed PICU (cardiac)                                                                         | Chart review, EMR query                   | 1763 | Consecutive            | Neonates<br>Infants<br>Children                | Median 1.1 years (IQR: 0.1-5.8)                                                               |



|                     |                                       |                                                     |               |   |           |                                              |                                                                                       |     |                                                       |                                                |                                               |
|---------------------|---------------------------------------|-----------------------------------------------------|---------------|---|-----------|----------------------------------------------|---------------------------------------------------------------------------------------|-----|-------------------------------------------------------|------------------------------------------------|-----------------------------------------------|
|                     |                                       |                                                     |               |   |           | and non-cardiac)                             |                                                                                       |     |                                                       | Adolescents                                    |                                               |
| O'Brien (2010)      | NR                                    | Retrospective cohort                                | United States | 1 | 2002-2007 | PCICU (cardiac only)                         | Chart review                                                                          | 992 | Consecutive                                           | Neonates<br>Infants<br>Children<br>Adolescents | Age (y) 2.7 +/- 4.2                           |
| Odek (2018)         | NR                                    | Retrospective cohort                                | Turkey        | 1 | 2008-2013 | Mixed PICU (cardiac and non-cardiac)         | Chart review                                                                          | 126 | Consecutive                                           | Neonates<br>Infants<br>Children<br>Adolescents | Median 10 months, range 1.5-168 months        |
| Ognibene (2011)     | NR                                    | Retrospective cohort                                | United States | 1 | 2006-2006 | Mixed PICU (cardiac and non-cardiac)         | Chart review, EMR query                                                               | 616 | Consecutive                                           | Neonates<br>Infants<br>Children<br>Adolescents | NR                                            |
| Paret (1999)        | Other (Reported as none)              | Retrospective cohort                                | Israel        | 1 | 1990-1993 | PICU (non-cardiac only)                      | Chart review                                                                          | 61  | Consecutive                                           | Children<br>Adolescents                        | Median 6y (range, 1-15)                       |
| Piastra (2017)      | NGO, Other ("departmental resources") | Prospective cohort, Observational/descriptive study | Italy         | 1 | 2009-2011 | PICU (non-cardiac only), Operating room (OR) | Prospective data collection                                                           | 352 | Consecutive                                           | Infants<br>Children<br>Adolescents             | Mean age, 68 ± 66; median age 38 [9.0; 128.0] |
| Plubrukarn (2003)   | NR                                    | Retrospective cohort                                | Thailand      | 1 | 1993-2001 | ER                                           | Chart review                                                                          | 72  | Consecutive                                           | Infants<br>Children<br>Adolescents             | Median 28m (range, 3m-14y)                    |
| Polito (2008)       | NR                                    | Retrospective cohort                                | United States | 1 | 2003-2003 | PCICU (cardiac only)                         | Other (Data gleaned from larger 2003 data set designed for a different investigation) | 378 | Other (Patients in primary data set with RACHS-1 >=3) | Neonates<br>Infants<br>Children<br>Adolescents | 0.61 [0.01-14.41] [10%tile-90%tile]           |
| Preissig (2009)     | NR                                    | Observational/descriptive study                     | United States | 1 | 2006-2007 | PICU (non-cardiac only)                      | Chart review                                                                          | 155 | Consecutive                                           | Infants<br>Children<br>Adolescents             | NR                                            |
| Rake (2010)         | NGO                                   | Retrospective cohort                                | United States | 1 | 2000-2005 | PICU (non-cardiac only)                      | Chart review, EMR query, Registry                                                     | 101 | Consecutive                                           | Neonates<br>Infants<br>Children<br>Adolescents | Mean 8.4 years (SD 6.6)                       |
| Rhine (2012)        | NR                                    | Retrospective cohort                                | United States | 1 | NR        | PICU of unknown composition                  | Chart review                                                                          | 35  | NR/Unable to determine                                | Neonates<br>Infants<br>Children                | NR                                            |
| Seyed Sadaat (2012) | NR                                    | Retrospective cohort                                | Iran          | 1 | 2007-2011 | PICU of unknown composition                  | Chart review                                                                          | 122 | Consecutive                                           | Children<br>Adolescents                        |                                               |
| Srinivasan (2004)   | NGO                                   | Retrospective cohort                                | US            | 1 | 2001-2002 | PICU (non-cardiac only)                      | Chart review, EMR query                                                               | 152 | Consecutive                                           | Infants<br>Children<br>Adolescents             |                                               |
| Tala (2014)         | Govt.                                 | Retrospective cohort                                | United States | 1 | 2007-2010 | Mixed PICU (cardiac                          | Chart review                                                                          | 789 | Consecutive                                           | Neonates<br>Infants                            |                                               |

|                    |     |                                                        |                        |   |           |                                      |                             |      |             |                                       |  |
|--------------------|-----|--------------------------------------------------------|------------------------|---|-----------|--------------------------------------|-----------------------------|------|-------------|---------------------------------------|--|
|                    |     |                                                        |                        |   |           | and non-cardiac)                     |                             |      |             | Children Adolescents                  |  |
| Toro-Polo (2018)   | NR  | Retrospective cohort, Observational/ descriptive study | Peru                   | 1 | 2012-2013 | PICU (non-cardiac only)              | Chart review                | 552  | Convenience | Infants Children Adolescents          |  |
| Tude Melo (2010)   | NGO | Retrospective cohort                                   | France                 | 1 | 2000-2005 | ER                                   | Chart review                | 315  | Consecutive | Neonates Infants Children Adolescents |  |
| Ulate (2008)       | NR  | Retrospective cohort                                   | United States          | 1 | 2006-2007 | Mixed PICU (cardiac and non-cardiac) | Chart review                | 177  | Consecutive | Neonates Infants Children Adolescents |  |
| Uleanya (2017)     | NR  | Prospective cohort                                     | Nigeria                | 1 | 2014-2015 | ER                                   | Prospective data collection | 300  | Consecutive | Infants Children                      |  |
| Wintergerst (2006) | NGO | Retrospective cohort                                   | United States          | 1 | 2003-2004 | Mixed PICU (cardiac and non-cardiac) | Chart review                | 1094 | Consecutive | Neonates Children Adolescents         |  |
| Yates (2006)       | NR  | Retrospective cohort                                   | United States          | 1 | 2002-2004 | PCICU (cardiac only)                 | Chart review                | 184  | Consecutive | Neonates Infants                      |  |
| Yokochi (2016)     | NR  | Retrospective cohort                                   | Japan                  | 1 | 2004-2014 | PICU                                 | Chart review                | 213  | Consecutive | Infants Children Adolescents          |  |
| Yung (2008)        | NGO | Prospective cohort                                     | Australia, New Zealand | 9 | 2004-2004 | Mixed PICU (cardiac and non-cardiac) | Prospective data collection | 409  | Consecutive | Neonates Infants Children Adolescents |  |
| Zant (2016)        | NR  | Retrospective cohort                                   | Germany                | 1 | 2008-2011 | Other (Liver transplant patients)    | Chart review                | 46   | Consecutive | NR/Unable to determine                |  |

### B. Thyroid dysfunction (n=18)

|                   |    |                                                        |               |   |           |                        |                             |     |                        |                                       |                                                       |
|-------------------|----|--------------------------------------------------------|---------------|---|-----------|------------------------|-----------------------------|-----|------------------------|---------------------------------------|-------------------------------------------------------|
| Aggarwal (2020)   | NR | Retrospective cohort, Observational/ descriptive study | United States | 1 | 2011-2016 | ER                     | Registry                    | 414 | Consecutive            | Neonates Infants Children Adolescents | 14.7 +/-3.89, normal TSH ;15.1 +/- 3.00, abnormal TSH |
| Anand (1994)      | NR | Case/control study (case matched)                      | India         | 1 | NR        | NR/Unable to determine | Prospective data collection | 60  | NR/Unable to determine | Infants                               | Mean 4.33 +/- 3.28 mos                                |
| Cantinotti (2013) | NR | Prospective cohort                                     | Italy         | 1 | 2009-2011 | PCICU (cardiac only)   | Prospective data collection | 162 | NR/Unable to determine | Neonates Infants Children             | NR                                                    |
| Dagan (2006)      | NR | Prospective cohort                                     | Israel        | 1 | NR        | NR/Unable to determine | Prospective data collection | 20  | NR/Unable to determine | Neonates                              | Not available                                         |

|                    |           |                                                                  |                     |   |           |                                      |                                              |     |                                              |                                                |                                                           |
|--------------------|-----------|------------------------------------------------------------------|---------------------|---|-----------|--------------------------------------|----------------------------------------------|-----|----------------------------------------------|------------------------------------------------|-----------------------------------------------------------|
| denBrinker (2005)  | Industry  | Prospective cohort                                               | Netherlands         | 1 | 1997-2000 | PICU of unknown composition          | Prospective data collection                  | 69  | NR/Unable to determine                       | Neonates<br>Infants<br>Children<br>Adolescents | Not available                                             |
| El-Ella (2019)     | NR        | Prospective cohort, Observational/descriptive study              | Egypt               | 1 | 2017-2017 | Mixed PICU (cardiac and non-cardiac) | Prospective data collection                  | 70  | NR/Unable to determine                       | Infants<br>Children<br>Adolescents             | 19.5 [1.3---180] months                                   |
| Gielen (2012)      | Govt.     | Secondary analysis fo RCTs                                       | Belgium             | 1 | NR        | PICU of unknown composition          | Prospective data collection                  | 588 | Consecutive                                  | Neonates<br>Infants<br>Children<br>Adolescents | Not stated in the paper                                   |
| Goldsmid (2011)    | NR        | Prospective cohort                                               | Argentina           | 1 | 2007-2008 | Mixed PICU (cardiac and non-cardiac) | Prospective data collection                  | 94  | Consecutive                                  | Neonates                                       | Enrolled at birth                                         |
| Gottschlich (2002) | NGO       | Randomized controlled trial (RCT), Cross-over RCT, Pragmatic RCT | United States       | 1 | 1991-2001 | PICU of unknown composition          | Prospective data collection                  | 72  | Consecutive                                  | Neonates<br>Infants<br>Children                | Not stated                                                |
| Hebbar (2009)      | NGO       | Prospective cohort                                               | United States       | 1 | 2005-2006 | PICU (non-cardiac only)              | Prospective data collection                  | 73  | NR/Unable to determine                       | Infants<br>Children<br>Adolescents             | Median 72 months, range 3-228                             |
| Jacobs (2019)      | Govt. NGO | Secondary analysis of RCTs                                       | Belgium, Netherland | 3 | 2012-2015 | Mixed PICU (cardiac and non-cardiac) | Prospective data collection                  | 982 | Consecutive                                  | Neonates<br>Infants<br>Children<br>Adolescents | Median 1.92 years [0.35-7.57]                             |
| Marks (2009)       | NGO       | Prospective cohort                                               | Canada              | 1 | 2003-2005 | PCICU (cardiac only)                 | Prospective data collection                  | 21  | Consecutive                                  | Children                                       | Mean 57.7 (SD, 36.2)                                      |
| Marwali (2019)     | NR        | Secondary analysis of RCTs                                       | Indonesia           | 1 | 2013-2014 | PCICU (cardiac only)                 | Other (Data base generated in the OTICC RCT) | 203 | Other (Data base generated in the OTICC RCT) | Neonates<br>Infants<br>Children                | Median [IQR] provided for each of 4 groups                |
| Merchant (2008)    | NR        | Prospective cohort                                               | USA                 | 1 | 2005-2005 | PCICU (cardiac only)                 | Prospective data collection                  | 20  | Consecutive                                  | Neonates<br>Infants<br>Children                | Mean 9.0m (SD, 11.3)                                      |
| Sayarifard (2018)  | NGO       | Prospective cohort, Observational/descriptive study              | Iran                | 1 | 2016-2017 | PICU of unknown composition          | Prospective data collection                  | 35  | Convenience                                  | Infants<br>Children<br>Adolescents             | 2 years (SD: $\pm$ 3.8 years, range: 4 months - 15 years) |
| Suvarna (2009)     | NR        | Case/control study (case-matched)                                | India               | 1 | NR        | PICU of unknown composition          | Chart review, Prospective data collection    | 30  | Consecutive                                  | Infants<br>Children                            |                                                           |
| Talwar (2012)      | NR        | Prospective cohort                                               | India               | 1 | 2008-2008 | Mixed PICU (cardiac and non-cardiac) | Prospective data collection                  | 100 | Consecutive                                  | Neonates<br>Infants<br>Children                |                                                           |

|                                      |            |                                                                  |                |   |           |                                      |                             |     |                        |                                                |                                                                                   |
|--------------------------------------|------------|------------------------------------------------------------------|----------------|---|-----------|--------------------------------------|-----------------------------|-----|------------------------|------------------------------------------------|-----------------------------------------------------------------------------------|
| Yildizdas (2004)                     | NR         | Case/control study (case matched)                                | Turkey         | 1 | 2000-2002 | PICU of unknown composition          | Prospective data collection | 102 | NR/Unable to determine | Infants<br>Children                            |                                                                                   |
| <b>C. Adrenal dysfunction (n=22)</b> |            |                                                                  |                |   |           |                                      |                             |     |                        |                                                |                                                                                   |
| Amstadter (2011)                     | Govt., NGO | Prospective cohort                                               | United States  | 1 | 2002-2004 | NR/Unable to determine               | Prospective data collection | 103 | Consecutive            | Children<br>Adolescents                        | 14.63 +/- 6.18 years                                                              |
| Balbao (2014)                        | NGO        | Prospective cohort                                               | Brazil         | 1 | 2009-2011 | PICU of unknown composition          | Prospective data collection | 34  | Consecutive            | Neonates<br>Infants<br>Children<br>Adolescents | Median age was 34 months (range 0.7-201 months)                                   |
| Bekhit (2019)                        | NR         | Prospective cohort                                               | Egypt          | 2 | NR        | PICU of unknown composition          | Prospective data collection | 81  | NR/Unable to determine | Infants<br>Children                            | Total cohort not summarized, but generally median 8.5-10 months (IQR 3-30 months) |
| Bone (2002)                          | NR         | Prospective cohort                                               | England        | 2 | 1997-1998 | PICU of unknown composition          | Prospective data collection | 65  | Consecutive            | Infants<br>Children<br>Adolescents             | Median age 2.5 years (range 0.2 - 15 years)                                       |
| Garcia (2010)                        | NR         | Prospective cohort                                               | United States  | 1 | 2007-2008 | PCICU (cardiac only)                 | Prospective data collection | 21  | Consecutive            | Neonates                                       | Median 7 days (IQR: 1 - 30 days)                                                  |
| Gottschlich (2002)                   | NGO        | Randomized controlled trial (RCT), Cross-over RCT, Pragmatic RCT | United States  | 1 | 1991-2001 | PICU of unknown composition          | Prospective data collection | 72  | Consecutive            | Neonates<br>Infants<br>Children                | Not stated                                                                        |
| Hatherill (1999)                     | NR         | Prospective cohort                                               | England        | 1 | 1996-1997 | PICU of unknown composition          | Prospective data collection | 33  | Consecutive            | Infants<br>Children<br>Adolescents             | Median 109 months (range 5 to 192 months)                                         |
| Hebbar (2009)                        | NGO        | Prospective cohort                                               | United States  | 1 | 2005-2006 | PICU (non-cardiac only)              | Prospective data collection | 73  | NR/Unable to determine | Infants<br>Children<br>Adolescents             | Median 72 months, range 3-228                                                     |
| Levy-Shraga (2016)                   | NR         | Retrospective cohort                                             | Israel         | 1 | 2006-2013 | Mixed PICU (cardiac and non-cardiac) | Chart review                | 99  | NR/Unable to determine | Neonates<br>Infants<br>Children<br>Adolescents | Median 2 months, IQR 0.5-19                                                       |
| Lichtakowicz-Krynska (2004)          | Govt.      | Prospective cohort                                               | United Kingdom | 2 | NR        | PICU of unknown composition          | Prospective data collection | 60  | NR/Unable to determine | NR/Unable to determine                         | Group A: mean 4.4 yrs (range 0.5-14.4); Group B mean 4.1 yrs (range 0.3 - 16.3)   |
| Menon (2002)                         | NGO        | Prospective cohort, Observational/descriptive study              | Canada         | 1 | 1997-1997 | Mixed PICU (cardiac and non-cardiac) | Prospective data collection | 13  | Consecutive            | Neonates<br>Infants<br>Children                | 1 day to 16 years                                                                 |
| Menon (2010)                         | Govt.      | Prospective cohort,                                              | Canada         | 7 | 2005-2008 | Mixed PICU (cardiac                  | Prospective data collection | 381 | Consecutive            | Neonates<br>Infants                            | 4.01 years (IQR, 0.56-12.98),                                                     |

|                             |                                                                  |                                     |                  |   |           |                                                |                                |     |                           |                                                |                                                                      |
|-----------------------------|------------------------------------------------------------------|-------------------------------------|------------------|---|-----------|------------------------------------------------|--------------------------------|-----|---------------------------|------------------------------------------------|----------------------------------------------------------------------|
|                             |                                                                  | Observational/<br>Descriptive study |                  |   |           | and non-<br>cardiac)                           |                                |     |                           | Children<br>Adolescents                        |                                                                      |
| Menon (2018)                | Govt.                                                            | Secondary<br>analysis of RCTs       | Canada           | 7 | 2014-2016 | Mixed PICU<br>(cardiac<br>and non-<br>cardiac) | Prospective<br>data collection | 30  | Convenience               | Neonates<br>Infants<br>Children<br>Adolescents | Not stated                                                           |
| Nichols (2017)              | Govt.,<br>NGO                                                    | Retrospective<br>cohort             | US               | 1 | 2013-2013 | PICU (non-<br>cardiac<br>only)                 | Chart review                   | 70  | Consecutive               | Infants<br>Children<br>Adolescents             | No summary of<br>entire cohort, but:<br>median 74-77, IQR<br>19-174  |
| Pizarro (2005)              | Govt.                                                            | Prospective<br>cohort               | Brazil           | 1 | 2001-2003 | PICU of<br>unknown<br>composition              | Prospective<br>data collection | 57  | Consecutive               | Infants<br>Children<br>Adolescents             | 27 months (range:<br>1-213 months)                                   |
| Samransamrua<br>jkit (2007) | Govt.,<br>NGO                                                    | Prospective<br>cohort               | Thailand         | 1 | 2005-2005 | PICU of<br>unknown<br>composition              | Prospective<br>data collection | 16  | Consecutive               | Infants<br>Children<br>Adolescents             | Listed as 2 groups:<br>median 3.5 mos<br>(n=6), and 24 mos<br>(n=10) |
| Sarathi (2007)              | Govt.,<br>Other<br>(Indian<br>Council of<br>Medical<br>Research) | Prospective<br>cohort               | India            | 1 | 2004-2005 | PICU of<br>unknown<br>composition              | Prospective<br>data collection | 30  | Consecutive               | Infants<br>Children                            | NR                                                                   |
| Sasser (2012)               | NR                                                               | Retrospective<br>cohort             | United<br>States | 1 | 2009-2010 | PCICU<br>(cardiac<br>only)                     | Chart review,<br>EMR query     | 41  | Consecutive               | Neonates                                       | Median 6 Days<br>(Range 1-38)                                        |
| Singhi (2006)               | NR                                                               | Prospective<br>cohort               | India            | 1 | NR        | ER                                             | Prospective<br>data collection | 30  | Consecutive               | Infants<br>Children                            |                                                                      |
| van den Akker<br>(2009)     | Industry                                                         | Prospective<br>cohort               | Netherlands      | 1 | NR        | PICU of<br>unknown<br>composition              | Prospective<br>data collection | 23  | NR/Unable to<br>determine | Infants<br>Children<br>Adolescents             |                                                                      |
| Verweij (2012)              | NR                                                               | Retrospective<br>cohort             | Netherlands      | 1 | 2005-2008 | Mixed PICU<br>(cardiac<br>and non-<br>cardiac) | Chart review                   | 62  | Consecutive               | Neonates<br>Infants<br>Children                |                                                                      |
| Yehya (2016)                | Govt.<br>NGO                                                     | Retrospective<br>cohort             | US               | 1 | 2011-2015 | PICU (non-<br>cardiac<br>only)                 | Prospective<br>data collection | 155 | Consecutive               | Infants<br>Children<br>Adolescents             |                                                                      |

Abbreviations: Govt., government; NGO, nongovernmental organization; NR, not reported; PICU, pediatric intensive care unit; PCICU, pediatric cardiac intensive care unit; IQR, interquartile range; SD, standard deviation; wks, weeks; mo, months; yr, years

<sup>a</sup>Neonates (0 to 30 days), Infants (31 days to < 1 year), Children (1 year to < 12 years), Adolescents (12 years to < 18 years)

<sup>b</sup>Data are presented as mean (SD) or median [interquartile range or range]

**Supplemental Table 2. Performance Characteristics for Assessment Tools and Scores for Endocrine Dysfunction in Critically Ill Children (n=121 studies)**

| Author (yr)                                   | Score/assessment tool | Is this a study of score/tool derivation or validation?            | Inclusion criteria                                                                                                       | Timing of score/tool assessment                                                         | Outcomes                                                                        | Performance characteristics                                                                                                                                                                                             |
|-----------------------------------------------|-----------------------|--------------------------------------------------------------------|--------------------------------------------------------------------------------------------------------------------------|-----------------------------------------------------------------------------------------|---------------------------------------------------------------------------------|-------------------------------------------------------------------------------------------------------------------------------------------------------------------------------------------------------------------------|
| <b>A. Abnormal glucose homeostasis (n=84)</b> |                       |                                                                    |                                                                                                                          |                                                                                         |                                                                                 |                                                                                                                                                                                                                         |
| Agbenyega (2000)                              | Glucose concentration | Derivation                                                         | Other (Severe malaria)                                                                                                   | On admission to hospital                                                                | Other (Elevated lactate disposal)                                               | Other: Pearson's correlation                                                                                                                                                                                            |
| Alaei (2012)                                  | Glucose concentration | NR                                                                 | PCICU population (only cardiac)                                                                                          | Measurements of blood glucose level was collected on postoperative days 1, 2, 3, and 7. | Mortality, Organ-specific outcomes/residual morbidity                           | aOR: Patients with severe hyperglycemia showed a significantly higher Mortality rate (16/64 deaths [25%] vs. 13/315 deaths [4.12%]; $P < 0.001$ ) and more morbidities (16/64 [25%] vs. 43/315 [13.65%]; $P = 0.022$ ). |
| Al-Moffada (2001)                             | Glucose concentration | Derivation                                                         | Other (Near drowning and drownings)                                                                                      | In the emergency room prior to PICU admission                                           | Mortality, Functional outcomes /residual morbidity                              | Other: Chi squared test comparing proportions of bad neurologic outcomes in those with Glucose < 10 mmol/L versus > 10 mmol/L                                                                                           |
| Asiloglu (2011)                               | Glucose concentration | Derivation                                                         | Other (Traumatic brain injury patients)                                                                                  | On admission to PICU                                                                    | Mortality, Functional outcomes /residual morbidity                              | Other: Comparison of means of glucose values in those with good versus bad outcomes                                                                                                                                     |
| Babbitt (2013)                                | Glucose concentration | Derivation                                                         | Other (Intracranial injury)                                                                                              | Initial glucose (not clear ER versus PICU)                                              | Other (Intracranial hemorrhage)                                                 | Se: Using a serum glucose level of greater than 120 mg/dL as the cutoff for hyperglycemia, yielded a sensitivity of 64% and specificity of 91% for intracranial injury                                                  |
| Bahloul (2009)                                | Glucose concentration | Derivation                                                         | Other (Traumatic Brain Injury)                                                                                           | On admission to PICU                                                                    | Mortality                                                                       | Other: Blood glucose level on admission was significantly higher among children who died (11.2 +/- 7 mmol /l vs. 8.7 +/- 4 mmol/L; $p = 0.001$ )                                                                        |
| Ballweg (2007)                                | Glucose concentration | Other (Description of glucose conc vs neurodevelopmental outcomes) | PCICU population (only cardiac)                                                                                          | All glucose measurements during PCICU stay                                              | Other patient-centered outcomes, Other (Bayley Scales of Infant Development-II) | Other: No statistically significant correlations; glucose not important in univariable modeling                                                                                                                         |
| Ballweg (2009)                                | Glucose concentration | Other (Correlations of glucose conc with outcomes)                 | PCICU population (only cardiac), Other (Stage I palliation for various forms of single ventricle with arch obstruction.) | All glucose measurements during first 48 hrs                                            | Other patient-centered outcomes, Other (Bayley Scales of Infant Development-II) | Other: Pearson's correlation. no statistically significant correlations for glucose during univariate modeling                                                                                                          |

|                  |                       |                                                         |                                                                          |                                                                                 |                                                                                       |                                                                                                                                                                                                                                                                                                                                                                                                                                                                  |
|------------------|-----------------------|---------------------------------------------------------|--------------------------------------------------------------------------|---------------------------------------------------------------------------------|---------------------------------------------------------------------------------------|------------------------------------------------------------------------------------------------------------------------------------------------------------------------------------------------------------------------------------------------------------------------------------------------------------------------------------------------------------------------------------------------------------------------------------------------------------------|
| Bhutia (2013)    | Glucose concentration | Derivation                                              | General PICU population (only non-cardiac)                               | At admission and daily for 7 days or till ICU discharge (whichever was earlier) | Mortality, Outcomes related to MODS, Other (Duration of stay in the PICU)             | aOR: Of hyperglycemia >126 mg/dL and MODS: 2.96 (1.1-8.0); p= 0.033; aOR of hyperglycemia > 180 mg/dL and Mortality: 2.67 (1.1-6.5), p=0.031 and aOR of hyperglycemia > 200 mg/dL and Mortality: 3.4 (1.3-8.7); p=0.042                                                                                                                                                                                                                                          |
| Branco (2005)    | Glucose concentration | Derivation                                              | Other (Septic shock)                                                     | Peak glucose level during the PICU admission                                    | Mortality                                                                             | Se: The best peak glucose level for predicting death in children with sepsis was 178 mg/dL (sensitivity, 0.714)<br>Sp: The best peak glucose level for predicting death in children with sepsis was 178 mg/dL (specificity, 0.724)<br>AUROC: The area under the receiver operator curve for peak glucose level and Mortality rate was 0.754<br>Other: The relative risk of death in patients with peak glucose levels of >178 mg/dL was 2.59 (range, 1.37-4.88). |
| Burns (2008)     | Glucose concentration | Derivation                                              | Other (Neonates)                                                         | Neonatal hypoglycemia                                                           | Functional outcomes /residual morbidity                                               | Other: All except 1 of the infants with early transient hypoglycemia had outcomes within the reference range or mildly abnormal outcomes using a standardized neurologic assessment and Griffiths' Mental Developmental Scales                                                                                                                                                                                                                                   |
| Chiaretii (2002) | Glucose concentration | NR                                                      | Other (Head injury)                                                      | Admission to PICU                                                               | Functional outcomes /residual morbidity                                               | aOR: 1.55, 95% CI:1.01; 2.33, P value = 0.04                                                                                                                                                                                                                                                                                                                                                                                                                     |
| Chiaretti (1998) | Glucose concentration | Derivation                                              | Other (Head injury)                                                      | On admission to PICU                                                            | Functional outcomes /residual morbidity                                               | Other: Correlation but no R value provided. "There seemed to be a negative correlation between initial blood glucose level and outcome."                                                                                                                                                                                                                                                                                                                         |
| Chisti (2010)    | Glucose concentration | Derivation                                              | Other (Those with diarrheal illnesses)                                   | On admission                                                                    | Mortality                                                                             | Se: Sensitivity of hypoglycemia to predict death with 95% confidence intervals was 40% (14-73%)<br>Sp: Specificity of hypoglycemia to predict death with 95% confidence intervals was 88% (75- 95%)<br>PPV: PPV of hypoglycemia to predict death with 95% confidence intervals was 40% (14-73%)<br>aOR: 5.0, CI 1.1-23.0, P = 0.039                                                                                                                              |
| Chisti (2010)    | Glucose concentration | Other (Identification of risk factors of poor outcomes) | General PICU population (only non-cardiac)                               | Not stated                                                                      | Other (Bacteremia)                                                                    | aOR: Hyperglycemia (> 11mmol/L): 5.0 (0.9-28.7)                                                                                                                                                                                                                                                                                                                                                                                                                  |
| Chong (2015)     | Glucose concentration | Validation                                              | General PICU population (mixed cardiac and non-cardiac)                  | ED glucose , glucose levels at 48 and 72 hours of PICU                          | Mortality, Other (Duration of mechanical ventilation)                                 | Other: Using a cutoff glucose of 150mg/dL (8.3mmol/L), hyperglycemia was statistically significant for prolonged duration of mechanical ventilation and PICU stay. Persistent hyperglycemia up to 48 and 72 hours was also significantly associated with increased risk of death                                                                                                                                                                                 |
| Cochran (2003)   | Glucose concentration | Derivation                                              | Other (Did not specify - included all patients admitted to the hospital) | Hospital admission                                                              | Mortality, Organ-specific outcomes/residual morbidity, Other (Glasgow Outcome Scores) | aOR: Admission glucose (aOR 1.013 95% CI:1.003 - 10.23)                                                                                                                                                                                                                                                                                                                                                                                                          |
| Day (2008)       | Glucose concentration | Other (Association of hyperglycemia with risk of        | General PICU population (mixed cardiac and non-cardiac)                  | All PICU glucose concentrations                                                 | Organ-specific outcomes/residual morbidity, Other (Risk of Mortality (PRISM))         | Other: Pearson's correlation coefficients and p values. PRISM III: 0.545, p < 0.0001; MV Free Days: -0.44, p < 0.0001                                                                                                                                                                                                                                                                                                                                            |

|                    |                       |                                      |                                                                   |                                                                                                                          |                                                                                                                                    |                                                                                                                                                                                                                                                                                                                                                                                                                       |
|--------------------|-----------------------|--------------------------------------|-------------------------------------------------------------------|--------------------------------------------------------------------------------------------------------------------------|------------------------------------------------------------------------------------------------------------------------------------|-----------------------------------------------------------------------------------------------------------------------------------------------------------------------------------------------------------------------------------------------------------------------------------------------------------------------------------------------------------------------------------------------------------------------|
|                    |                       | death (PRISM) and organ dysfunction) |                                                                   |                                                                                                                          |                                                                                                                                    |                                                                                                                                                                                                                                                                                                                                                                                                                       |
| DeCampi (2010)     | Glucose concentration | Derivation                           | PCICU population (only cardiac)                                   | Glucose levels at multiple time points. There were 7 time points in the OR and PCICU.                                    | Mortality, Other (Duration of Mechanical Ventilation, Length of Stay, infections (ETT, blood, urine, wound))                       | Other: Multivariate model for LOS found pre-CPB glucose as a significant factor (beta-coeff -0.002 95% CI not reported, p = 0.014)                                                                                                                                                                                                                                                                                    |
| deFerranti (2004)  | Glucose concentration | Derivation                           | PCICU population (only cardiac), Other (OR)                       | Glucose levels at multiple time points intra-operatively. There were 7 time points but all were in OR and none in PCICU. | Functional outcomes /residual morbidity, Other (EEG findings, clinical seizures)                                                   | AUROC: Reported for only one time point (90 min after circ arrest or low flow CPB): 0.764, 95% CI not reported                                                                                                                                                                                                                                                                                                        |
| Egi (2008)         | Glucose concentration | Derivation                           | PCICU population (only cardiac)                                   | Glucose levels for the whole PCICU admission                                                                             | Mortality                                                                                                                          | AUROC: 6 AUCs were given depending on whether mean glucose or max glucose levels were used as well as the period that these measurements were taken. For overall PCICI stay, AUROC of mean glucose was 0.76.; AUROC for max glucose was 0.71. No 95% CI was given for all AUROCs<br>aOR: For mean glucose for Mortality: 1.07 (95% CIL 1.01 - 1.13)                                                                   |
| El-Sherbini (2018) | Glucose concentration | Derivation                           | General PICU population (only non-cardiac)                        | Day 1 of PICU admission                                                                                                  | Mortality, Outcomes related to MODS                                                                                                | Other: Correlations of hyperglycemia (BG > 126 mg/dL) with PRISM and MODS; beta cell dysfunction in 43% and low insulin sensitivity in 30%; severe hyperglycemia (G > 180 mg/dL) associated with Mortality                                                                                                                                                                                                            |
| Falcao (2008)      | Glucose concentration | Derivation                           | PCICU population (only cardiac)                                   | Glucose levels on first 10 days after cardiac surgery                                                                    | Mortality, Other (Duration of Mechanical Ventilation, Length of Stay, renal and hepatic dysfunction, new infection and CNS events) | AUROC: For morbidity against duration of hyperglycemia: 0.813; AUROC for Mortality and duration of hyperglycemia: 0.795<br>aOR: For peak glucose for Mortality: 1.002 (95% CI: 0.996 - 1.008); aOR for duration of hyperglycemia (<126mg/dL): 1.406 (95% CI 1.033 - 1.914). AOR for peaj glucose for morbidities: 0.997 (95% CI: 0.992 - 1.041); aOR duration of hyperglycemia for morbidities: 1.952 (1.522 - 2.503) |
| Faustino (2005)    | Glucose concentration | Derivation                           | General PICU population (mixed cardiac and non-cardiac)           | Any glucose measurement within PICU stay                                                                                 | Mortality, Other (Length of PICU stay)                                                                                             | Other: Correlation between max glucose level within 10 days of initial glucose measurement and PICU LOS. Also higher glucose level, higher Mortality.                                                                                                                                                                                                                                                                 |
| Faustino (2019)    | Glucose concentration | Derivation                           | General PICU population (only non-cardiac)                        | BG levels through ICU admission                                                                                          | Mortality, Outcomes related to MODS                                                                                                | Other: Comparisons: Hypoglycemia group ICU free days 15.3 (0-22.3) vs No hypoglycemia group ICU free days 20.2 (IQR 5.3-24.1), p 0.04                                                                                                                                                                                                                                                                                 |
| Filho (2016)       | Glucose concentration | Other (Study of association)         | Other (Children who underwent elective resection for brain tumor) | On admission to PICU                                                                                                     | Mortality, Organ-specific outcomes/residual morbidity, Other (PICU and hospital length of stay)                                    | aOR: Multivariate analysis showed that peak blood glucose levels on postoperative Day 1 were independently associated with a higher odds ratio for postoperative complication (OR 1.05).<br>Other: The occurrence of hyperglycemia (>150 mg/dl) upon admission to the ICU was associated with longer ICU (p = 0.003) and hospital (p = 0.001) stays.                                                                  |



|                    |                                                                                                                                        |                                                            |                                                                      |                                                     |                                                                                                                           |                                                                                                                                                                                                                                                                                                      |
|--------------------|----------------------------------------------------------------------------------------------------------------------------------------|------------------------------------------------------------|----------------------------------------------------------------------|-----------------------------------------------------|---------------------------------------------------------------------------------------------------------------------------|------------------------------------------------------------------------------------------------------------------------------------------------------------------------------------------------------------------------------------------------------------------------------------------------------|
| Fu (2019)          | Glucose concentration                                                                                                                  | Derivation                                                 | Other (PICU traumatic brain injury patients with GCS < 13)           | Probably at PICU admission but not completely clear | Mortality, Other (MV, PICU and hospital free days)                                                                        | aOR: 1.077 (0.978 to 1.186), p = 0.133                                                                                                                                                                                                                                                               |
| Fu (2017)          | Glucose concentration                                                                                                                  | Validation                                                 | General PICU population (mixed cardiac and non-cardiac)              | ED glucose and PICU glucose                         | Mortality, Other (PICU-, hospital-free days and ventilatory-free days)                                                    | Se: 76.5% for ED glucose > 10.2 mmol/L for Mortality as outcome<br>Sp: 85.9% for ED glucose > 10.2 mmol/L for Mortality as outcome<br>AUROC: 0.871 (95% CI 0.795 - 0.928) for ED glucose and Mortality                                                                                               |
| Ghafoori (2008)    | Glucose concentration                                                                                                                  | Other (Associations with development of mediastinitis)     | PCICU population (only cardiac), Other (Occurrence of mediastinitis) | 24 h glucose peak >7.2 mM                           | Other (Occurrence of mediastinitis)                                                                                       | aOR: 3.86 (1.07-14.02) p= 0.039                                                                                                                                                                                                                                                                      |
| Gottschlich (2002) | Glucose concentration, Adrenal axis evaluation, Thyroid function evaluation, Other (Glucagon, gastrin, epinephrine, insulin, dopamine) | Other (Descriptive levels of all the hormones of interest) | General PICU population (only non-cardiac)                           | PICU admission and weekly after that                | Other (Levels of the hormones)                                                                                            | Other: Description of the weekly values of hormones of interest depending on the group assigned to (early or late enteral feeding)                                                                                                                                                                   |
| Graf (1995)        | Glucose concentration                                                                                                                  | Derivation                                                 | General PICU population (only non-cardiac), Other (General wards)    | ED glucose                                          | Mortality, Other (Glasgow Outcome Scores)                                                                                 | Other: Multiple sensitivities and specificities noted in the article. However, because these levels are measures in ED, this article should be excluded.                                                                                                                                             |
| Hale (2018)        | Glucose concentration                                                                                                                  | Derivation                                                 | Other (Pediatric trauma patients requiring hospital admission)       | Hospital admission glucose concentrations.          | Outcomes related to MODS, Other (Seizures requiring medication following TBI and continuing following hospital discharge) | aOR: Moderate hyperglycemia (141-199 mg/dL) 2.8 [1.8-4.3]; Severe hyperglycemia (> 200 mg/dL), 3.3 [1.9-6.0]                                                                                                                                                                                         |
| Hirshberg (2008)   | Glucose concentration                                                                                                                  | Derivation                                                 | General PICU population (mixed cardiac and non-cardiac)              | All glucose levels within PICU stay                 | Mortality, Other (Hospital LOS, nosocomial infections)                                                                    | aOR: For hyperglycemia (< 150mg/dL) for mortality: 9.6 (95% CI: 1.2 - 77.2); aOR for glucose variability: 40.5 (95% CI: 4.6 - 358.7); Hyperglycemia also higher odds for nosocomial infection (aOR: 2.0 95% CI: 1.0-4.2); Hyperglycemia associated with Hospital LOS (beta coefficient not reported) |
| Hu (2017)          | Glucose concentration                                                                                                                  | Derivation                                                 | Other (Isolated head trauma with specific CT findings)               | Within 24 hours of admission                        | Mortality, Functional outcomes /residual                                                                                  | aOR: Progressive hemorrhagic brain injury - low risk, medium risk and high risk<br>Goodness of fit (calibration): C-statistic (HL method) for derivation model 0.87 (95% CI 0.81-0.9); validation model 0.88 (0.78-0.95)                                                                             |

|                 |                       |                                                        |                                                                                                          |                                                                      |                                                                               |                                                                                                                                                                                                                                                                                                                           |
|-----------------|-----------------------|--------------------------------------------------------|----------------------------------------------------------------------------------------------------------|----------------------------------------------------------------------|-------------------------------------------------------------------------------|---------------------------------------------------------------------------------------------------------------------------------------------------------------------------------------------------------------------------------------------------------------------------------------------------------------------------|
|                 |                       |                                                        |                                                                                                          |                                                                      | morbidity, Organ-specific outcomes/residual morbidity                         |                                                                                                                                                                                                                                                                                                                           |
| Hu (2018)       | Glucose concentration | Other (Study of association)                           | PCICU population (only cardiac)                                                                          | NR                                                                   | Organ-specific outcomes/residual morbidity, Outcomes related to MODS          | Other: Logistic regression showed intraoperative glycemic fluctuation was one of the risk factors for AKI ( $p=0.033$ ) and degree of AKI severity stage increased when the glycemic fluctuation increased ( $p<0.01$ )                                                                                                   |
| Huang (2012)    | Glucose concentration | Derivation                                             | PCICU population (only cardiac)                                                                          | Pre-operative BG, intraoperative BG and post-operative BG for 2 days | Mortality, Organ-specific outcomes/residual morbidity, Other (Length of stay) | AUROC: Weight at surgery and operating time<br>aOR: Weight at surgery and operating time<br>Goodness of fit (Calibration): Weight at surgery and operating time by H-L method                                                                                                                                             |
| Ichikawa (2017) | Glucose concentration | Derivation                                             | Other (Children with severe TBI from a large registry)                                                   | Unsure - some values at admission                                    | Mortality, Functional outcomes /residual morbidity                            | AUROC: Serum glucose $\geq 200$ mg/dL, GCS $\leq 5$ at admission, subarachnoid hemorrhage, dilated pupils<br>aOR: Serum glucose $\geq 200$ mg/dL, GCS $\leq 5$ at admission, subarachnoid hemorrhage, dilated pupils                                                                                                      |
| Jallow (2012)   | Glucose concentration | Derivation                                             | Other (Blood smear positive for asexual P. falciparum parasites and met WHO criteria for severe malaria) | At and during admission                                              | Mortality, Functional outcomes /residual morbidity                            | Se: Hypoglycemia 33.7<br>Sp: Hypoglycemia 79.7<br>AUROC: Hypoglycemia 0.56 (95% CI 0.53 - 0.59)<br>aOR: Hypoglycemia aOR 1.7 (95% CI 1.2-2.3)                                                                                                                                                                             |
| Jeschke (2014)  | Glucose concentration | Other (Comparison between survivors and non-survivors) | Other (Burns PICU population)                                                                            | Up to 90 days following PICU admission                               | Mortality                                                                     | Other: Non-survivors had higher BG levels than survivors from Day 2-7 and lasted 61-90 days after burn injury                                                                                                                                                                                                             |
| Jeschke (2010)  | Glucose concentration | Derivation                                             | Other (Burns PICU population)                                                                            | During ICU admission                                                 | Mortality                                                                     | LR: Daily average glucose levels $< 140$ mg/dL and mortality - LR test statistic 66.074; 6:00 am glucose levels $< 130$ mg/dL and mortality likelihood ratio test statistic - 50.877<br>AUROC: Daily average glucose levels $< 140$ mg/dL and mortality - 0.96; 6:00 am glucose levels $< 130$ mg/dL and mortality - 0.92 |
| Kan (2009)      | Glucose concentration | Derivation                                             | Other (Neurosurgical ICU)                                                                                | At admission to ICU and during ICU stay                              | Functional outcomes /residual morbidity                                       | aOR: Admission glucose level and poor outcome - aOR for every mg/dL 1.19 (95% CI 1.00 - 1.42)                                                                                                                                                                                                                             |
| Khajavi (2018)  | Glucose concentration | Derivation                                             | General PICU population (only non-cardiac)                                                               | BG during ICU admission                                              | Mortality                                                                     | aOR: Of hyperglycemia (BG $> 150$ mg/dL) 2.14 (95% CI 1.00 - 4.6; aOR of glucose variability (both BG $> 150$ mg/dL and $< 60$ mg/dL) 3.08 (95% CI 1.13-8.43))                                                                                                                                                            |
| Khan (2015)     | Glucose concentration | Derivation                                             | Other (PICU – unable to determine composition)                                                           | First 48 hours of PICU admission                                     | Mortality                                                                     | Other: Univariate analysis only using cut-off of 126mg/dL. Higher mortality in group with hyperglycemia.                                                                                                                                                                                                                  |
| Klein (2008)    | Glucose concentration | Other (Study of association)                           | General PICU population (only non-cardiac)                                                               | Maximum glucose level in the first day of PICU admission             | Mortality, Other (PICU LOS and mechanical ventilation days)                   | Other: Controlling for PRISM in survivors, GLFD was not associated with PLOS ( $P = .75$ ) or with MVD ( $P = .06$ ). GLFD was not significantly associated with survival ( $P = .76$ ).                                                                                                                                  |

|                  |                       |                              |                                                                                             |                                                                                                      |                                                                                                         |                                                                                                                                                                                                                                                                                                    |
|------------------|-----------------------|------------------------------|---------------------------------------------------------------------------------------------|------------------------------------------------------------------------------------------------------|---------------------------------------------------------------------------------------------------------|----------------------------------------------------------------------------------------------------------------------------------------------------------------------------------------------------------------------------------------------------------------------------------------------------|
| Kraft (2014)     | Glucose concentration | Derivation                   | Other (Burns PICU population)                                                               | At and during ICU admission                                                                          | Organ-specific outcomes/residual morbidity                                                              | Other: Incidence of pneumonia: 30% in group with BG > 150 mg/dL and 19% in group with BG < 150 mg/dL, $p < 0.05$                                                                                                                                                                                   |
| Krueger (2015)   | Glucose concentration | Other (Study of association) | PCICU population (only cardiac)                                                             | Glucose measurement immediately after admission to the ICU and then in hourly intervals for 4 hours. | Functional outcomes /residual morbidity, Other patient-centered outcomes                                | Other: Higher postoperative glucose levels were related to better cognitive performance in the univariate analysis ( $P < .03$ ), but not when other risk factors were taken into account.                                                                                                         |
| Kyle (2010)      | Glucose concentration | Derivation                   | General PICU population (only non-cardiac), Other (Received continuous infusion of insulin) | During the first 5 days of insulin infusion in the PICU                                              | Mortality, Outcomes related to MODS, Other (Length of stay)                                             | aOR: Trend towards association between hyperglycemia for more than 24 hrs and mortality (aOR 3.2, 95% CI 0.9-11.6), $p = 0.079$                                                                                                                                                                    |
| Lee (2016)       | Glucose concentration | Derivation                   | Other (Children with severe HFMD)                                                           | At and during hospital admission                                                                     | Mortality                                                                                               | aOR: BG > 120 mg/dL and short-term 3 day mortality aOR 2.12 (95% CI 0.33-13.58); BG > 120 mg/dL and hospital mortality aOR 1.01 (95% CI 0.21-4.74)                                                                                                                                                 |
| Leite (2013)     | Glucose concentration | Derivation                   | General PICU population (mixed cardiac and non-cardiac)                                     | Blood glucose levels with first 72 hrs of admission to PICU                                          | Mortality, Organ-specific outcomes/residual morbidity, Outcomes related to MODS, Other (Length of stay) | aOR: For hyperglycemia in first 24 hrs and mortality: 4.5 (95% CI 1.3-14.5); aOR for hyperglycemia for first 48 hrs and mortality: 7.4 (95% CI 2.0-27.4); aOR for hypoglycemia and prolonged LOS: 3.5 (95% CI 1.2-10.1); aOR for hypoglycemia and mortality in malnourished: 6.9 (95% CI 1.2-40.8) |
| Li (2015)        | Glucose concentration | Derivation                   | General PICU population (only non-cardiac)                                                  | Initial admission glucose and mean glucose within first 24 hours of PICU admission                   | Mortality                                                                                               | aOR: Hyperglycemia associated with mortality (aOR: 2.06 95%CI: 1.07-3.96). Hypoglycemia associated with mortality (aOR =12.68; 95 % CI, 4.48- 35.88)                                                                                                                                               |
| Lodha (2009)     | Glucose concentration | Derivation                   | General PICU population (only non-cardiac)                                                  | Day 1 of ICU admission                                                                               | Mortality                                                                                               | Other: Hypoglycemia (BG< 60 mg/dL) is associated with ICU mortality ( $p=0.003$ )                                                                                                                                                                                                                  |
| Lou (2010)       | Glucose concentration | Validation                   | PCICU population (only cardiac)                                                             | NR                                                                                                   | Mortality, Organ-specific outcomes/residual morbidity                                                   | aOR: Patients with hyperglycemia >150 had decreased OR to reach the composite (death, morbidity) endpoint (OR 0.22 95CI: 0.065-0.740, $P=0.014$ )                                                                                                                                                  |
| Maegaki (2015)   | Glucose concentration | Other (Investigational)      | Other (Children presenting with status epilepticus)                                         | At onset of status epilepticus                                                                       | Mortality, Functional outcomes /residual morbidity                                                      | aOR: For poor outcome (defined as neurological sequelae or in-hospital death), blood glucose <61 or >250 mg/dL, 7.101 (95%CI, 1.114-45.266), $p=0.038$                                                                                                                                             |
| Mahmoud (2018)   | Glucose concentration | Derivation                   | General PICU population (only non-cardiac)                                                  | Random blood glucose                                                                                 | Other (Critical illness polyneuropathy, critical illness myopathy)                                      | Other: Comparison: CIP/CIM patients with BG 230 mg/L vs non-CIP/CIM patients with BG 165 mg/dL, $p < 0.001$                                                                                                                                                                                        |
| Marsillio (2015) | Glucose concentration | Derivation                   | General PICU population (only non-cardiac), PCICU population (only cardiac)                 | 4 days prior to first at of positive blood culture from central line.                                | Mortality, Other (Ventilator-free days; ICU LOS)                                                        | aOR: Hyperglycemia (>126mg/dL) associated with mortality in children with CLABSI (aOR 1.9, 95% CI: 1.1 -6.4). No association in linear regression analysis for VFD and ICU LOS with glucose levels.                                                                                                |

|               |                       |                              |                                                                        |                                                                                                   |                                                                                                                                                                                                                                                                                                                                                                                                                  |                                                                                                                                                                                                                                                         |
|---------------|-----------------------|------------------------------|------------------------------------------------------------------------|---------------------------------------------------------------------------------------------------|------------------------------------------------------------------------------------------------------------------------------------------------------------------------------------------------------------------------------------------------------------------------------------------------------------------------------------------------------------------------------------------------------------------|---------------------------------------------------------------------------------------------------------------------------------------------------------------------------------------------------------------------------------------------------------|
| Marton (2007) | Glucose concentration | Other (Investigational)      | Other (Infants <12m with severe TBI)                                   | Within the first 24 h post-admission                                                              | Functional outcomes /residual morbidity                                                                                                                                                                                                                                                                                                                                                                          | Other: Correlation: for the outcome of GOS at discharge and at 12m after discharge (GOS<5), blood glucose >200mg/dL at 24h: Pearson correlation coefficient, -0.90 (p<0.0001)                                                                           |
| Melo (2010)   | Glucose concentration | Validation                   | Other (Children with severe TBI)                                       | With 48h from admission                                                                           | Mortality                                                                                                                                                                                                                                                                                                                                                                                                        | aOR: For mortality, blood glucose >200mg/dL: 6.14 (95%CI, 2.25-16.73), p=0.0003                                                                                                                                                                         |
| Melo (2009)   | Glucose concentration | Other (Investigational)      | Other (Children <6y with severe TBI (GCS<=8) due to fall from windows) | At admission                                                                                      | Mortality                                                                                                                                                                                                                                                                                                                                                                                                        | aOR: For in-hospital mortality, blood glucose >200mg/dL: 12.77 (95%CI, 1.21-134.68), p=0.034                                                                                                                                                            |
| Moga (2011)   | Glucose concentration | Other (Study of association) | PCICU population (only cardiac)                                        | Postoperative glucose values were analyzed for 72 hrs and divided into 6-hr intervals.            | Mortality, Organ-specific outcomes/residual morbidity, Other (Composite morbidity-mortality outcome, stroke, seizures, hospital/intensive care unit stay. Longer durations of moderate or severe hyperglycemia were associated with increased odds of the composite morbidity-mortality outcome, lactic acidosis, cardiac arrest, vasopressin use, ventilation time, longer intensive care unit/hospital stays.) | aOR: Composite outcome, 2.25 (1.51-3.35), P <.001 ICU stay 0.266 (0.064), P <.001 Hospital stay, 0.184 (0.063), P <.004 Seizure 2.60 (1.10-6.14), P = .03 Lactic acidosis 3.18 (1.64-6.12), P =.001                                                     |
| Nagao (2008)  | Glucose concentration | Validation                   | Other (Influenza-associated encephalopathy)                            | Unable to determine                                                                               | Mortality                                                                                                                                                                                                                                                                                                                                                                                                        | aOR: For the outcome of mortality, blood glucose >=150 mg/dL (P=0.04) for multivariable regression analysis, but aOR (95%CI) not reported                                                                                                               |
| Narci (2009)  | Glucose concentration | Other (Investigational)      | Other (Pediatric trauma patients)                                      | At admission                                                                                      | Other (Liver trauma)                                                                                                                                                                                                                                                                                                                                                                                             | aOR: For morbidity (definition not provided), blood glucose (cutoff not provided): 3.01, p=0.03 (95%CI not provided)<br>Other: Correlation: for hospital LOS, ICU LOS, blood glucose (cutoff not provided), r=0.08, p=0.93; r=0.87, p=0.39 respectively |
| Nayak (2013)  | Glucose concentration | Derivation                   | General PICU population (mixed cardiac and non-cardiac)                | Admission to PICU (0-3 hrs); Day 1 of PICU (3-24 hrs), Day 2, Day 3 and so forth during PICU stay | Mortality                                                                                                                                                                                                                                                                                                                                                                                                        | Other: Hazard ratio for day 1 delta glucose per mg/dL and 100-day mortality: 1.07 (1.03-1.10)                                                                                                                                                           |

|                   |                       |                                                                     |                                                                                          |                                                     |                                                                                                           |                                                                                                                                                                                                                                                                                                                                                                                 |
|-------------------|-----------------------|---------------------------------------------------------------------|------------------------------------------------------------------------------------------|-----------------------------------------------------|-----------------------------------------------------------------------------------------------------------|---------------------------------------------------------------------------------------------------------------------------------------------------------------------------------------------------------------------------------------------------------------------------------------------------------------------------------------------------------------------------------|
| O'Brien (2010)    | Glucose concentration | Other (Study of association)                                        | PCICU population (only cardiac)                                                          | The highest glucose while on CPB was recorded.      | Other (Bacteremia)                                                                                        | Other: Unadjusted odds ratio: each intraoperative increase of 1 mg/dL in glucose level was related to a patient having a 1.0% increased risk of postoperative bacteremia (odds ratio, 1.01; 95% confidence interval, 1.004 to 1.019; $p < 0.004$ ).                                                                                                                             |
| Odek (2018)       | Glucose concentration | Other (Study of association)                                        | General PICU population (mixed cardiac and non-cardiac)                                  | Day 1 of PICU admission at 1, 2, 4, 8, and 24 hours | Outcomes related to MODS, Other (Higher Wernovsky inotropic score and vasoactive-inotropic score)         | Other: Multivariate model, we found higher PRISM III-24 score (OR, 1.1; 95% CI 1.02-1.18; $p = 0.004$ ) was significantly associated with postoperative hyperglycemia. Postoperative hyperglycemia was not associated with duration of MV ( $p = 0.840$ ), length of PICU stay ( $p = 0.299$ ), healthcare associated infections ( $p = 0.569$ ), or mortality ( $p = 0.690$ ). |
| Ognibene (2011)   | Glucose concentration | Derivation                                                          | General PICU population (mixed cardiac and non-cardiac)                                  | NR                                                  | Mortality, Other (Length of stay, days of mechanical ventilation)                                         | Other: Spontaneous hypoglycemia (BG < 60 mg/dL) and greater length of stay ( $p < 0.001$ ) and more days of mechanical ventilation ( $p < 0.001$ ); hyperglycemia (BG > 150 mg/dL) associated with longer lengths of stay ( $p < 0.001$ ), and more days of mechanical ventilation ( $p = 0.01$ )                                                                               |
| Paret (1999)      | Glucose concentration | Other (Investigational)                                             | Other (Trauma from fall of at least 1m)                                                  | At admission to the ED                              | Mortality                                                                                                 | Other: Correlation: univariate correlation of higher blood glucose at presentation with mortality ( $p < 0.001$ , but r-value not provided). No adjustment for confounders was done.                                                                                                                                                                                            |
| Piastra (2017)    | Glucose concentration | Validation                                                          | Other (Patients undergoing craniotomy)                                                   | During surgery for craniotomy                       | Other patient-centered outcomes, Other (PICU duration of stay as a function of the Glycemic Stress Index) | Se: For PICU LOS > 200 hrs, 86%<br>Sp: For PICU LOS > 200 hrs, 69%<br>PPV: For PICU LOS > 200 hrs, 5.4%<br>NPV: For PICU LOS > 200 hrs, 99.6%<br>LR: For PICU LOS > 200 hrs, + LR, 2.8; -LR, 0.2<br>AUROC: 0.74 ( $p = 0.03$ ) for GSI to predict PICU stay >200 h and 0.67 ( $p = 0.01$ ) to predict PICU stay >100 h                                                          |
| Plubrukarn (2003) | Glucose concentration | Other (Investigational)                                             | Other (children presenting to the ED with near drowning)                                 | At presentation to the ED                           | Mortality, Functional outcomes /residual morbidity                                                        | PPV: for poor outcome (death or vegetative state), high blood glucose (unclear cutoff): 66.7%                                                                                                                                                                                                                                                                                   |
| Polito (2008)     | Glucose concentration | Other (Association of intraoperative glucose conc and hospital LOS) | PCICU population (only cardiac), Other (Cardiac surgery patients with RACHS-1 $\geq 3$ ) | Intraoperative glucose concentrations               | Other (Primary: hospital LOS; secondary: death or severe in-hospital morbidity)                           | Other: No association of intraop glucose and hospital LOS on multivariable analysis                                                                                                                                                                                                                                                                                             |
| Preissig (2009)   | Glucose concentration | Validation                                                          | General PICU population (only non-cardiac)                                               | No specific timeframe                               | Other (Outcome was hyperglycemia)                                                                         | Other: Pts with PELOD >12 had higher BGs, higher insulin requirements, and longer period on insulin therapy                                                                                                                                                                                                                                                                     |
| Rake (2010)       | Glucose concentration | Derivation                                                          | General PICU population (only non-cardiac)                                               | First 72 hrs of PICU stay                           | Mortality                                                                                                 | aOR: Mean BG and PICU mortality (aOR: 1.02, 95% CI 1.00-1.05); BG variability and PICU mortality (aOR: 1.03, 95% CI 1.01-1.05)                                                                                                                                                                                                                                                  |
| Rhine (2012)      | Glucose concentration | Validation                                                          | Other (Trauma)                                                                           | Admission                                           | Functional outcomes /residual morbidity, Organ-specific                                                   | aOR: GLASGOW OUTCOME SCALE: OR for poor GOS 5.20 (95CI: 1.15-23.54, X2 2.14, $P 0.03$ if BG >150 on admission)                                                                                                                                                                                                                                                                  |

|                     |                       |                                                                       |                                                         |                                                       |                                                                                                                                    |                                                                                                                                                                                                                                                                                                                                                                                                                                                                                     |
|---------------------|-----------------------|-----------------------------------------------------------------------|---------------------------------------------------------|-------------------------------------------------------|------------------------------------------------------------------------------------------------------------------------------------|-------------------------------------------------------------------------------------------------------------------------------------------------------------------------------------------------------------------------------------------------------------------------------------------------------------------------------------------------------------------------------------------------------------------------------------------------------------------------------------|
|                     |                       |                                                                       |                                                         |                                                       | outcomes/residual morbidity                                                                                                        |                                                                                                                                                                                                                                                                                                                                                                                                                                                                                     |
| Seyed Sadaat (2012) | Glucose concentration | NR                                                                    | General PICU population (only non-cardiac)              | NR                                                    | Mortality, Other (LOS)                                                                                                             | aOR: Persistent hyperglycemia over first 2 days OR 2.84 (0.89-9.1), P=0.08; Persistent hyperglycemia over first 3 days OR 11.1 (2.95-41.7), P=0.001<br>Other: Mean BG survivors vs nonsurvivors on day 1: 244 +/- 121 vs 184 +/- 62; P=0.003, similar on days 2 and 3 (212 v 146, 183 v 111)                                                                                                                                                                                        |
| Srinivasan (2004)   | Glucose concentration | Validation                                                            | General PICU population (only non-cardiac)              | Entire PICU stay                                      | Mortality                                                                                                                          | aOR: Median BG >150 mg/dL had OR 2.96 (95CI 1.06-8.33; p<0.05) for mortality<br>Other: Correlation of BG level at 24h with mortality, p<0.001, R <sup>2</sup> =0.18, BG<100 - 8.3% mortality, BG 100-140 12.5%, BG 141-180 20%, BG>180 28.5%                                                                                                                                                                                                                                        |
| Tala (2014)         | Glucose concentration | Validation                                                            | General PICU population (mixed cardiac and non-cardiac) | Highest blood glucose measured during the admission   | Mortality, Functional outcomes /residual morbidity                                                                                 | Se: Of BG>150 for predicting VTE: 91%<br>Sp: 38%<br>AUROC: 0.72, p=0.02<br>aOR: 4.1, 95CI: 1.2-14.1, p=0.02                                                                                                                                                                                                                                                                                                                                                                         |
| Toro-Polo (2018)    | Glucose concentration | Derivation                                                            | General PICU population (only non-cardiac)              | First blood glucose level at PICU admission           | Mortality                                                                                                                          | Se: For glucose < 65 mg/dL, 17.4%; for glucose > 200 mg/dL, 19.6%<br>Sp: 91.7% for glucose values of < 65mg/dL (3.61mmol/L) and for > 200mg/dL (> 11.1mmol/L) , 93.9%<br>PPV: For glucose < 65 mg/dL, 29.6%; for glucose > 200 mg/dL, 39.1%<br>NPV: For glucose < 65 mg/dL, 84.7%; for glucose > 200mg/dL, 85.4%<br>AUROC: 0.53 (95%CI 0.45 to 0.60)<br>aOR: < 65mg/dL (3.61mmol/L) (RR: 2.01; 95%CI 1.14 - 3.53), glucose > 200mg/ dL (> 11.1mmol/L) (RR: 2.91; 95%CI 1.71 - 4.55) |
| Tude Melo (2010)    | Glucose concentration | Validation                                                            | Other (Neurotrauma)                                     | Admission                                             | Mortality                                                                                                                          | aOR: >=180 mg/dL OR for mortality 6.14 (95CI: 2.25-16.73)                                                                                                                                                                                                                                                                                                                                                                                                                           |
| Ulate (2008)        | Glucose concentration | Derivation                                                            | PCICU population (only cardiac)                         | Day 1 of ICU admission; first 5 days of ICU admission | Mortality, Other (Length of stay)                                                                                                  | Other: No association of hyperglycemia with mortality in first 24 hrs; Higher mortality with hyperglycemia (different definitions cut-offs) in day 2-5 span                                                                                                                                                                                                                                                                                                                         |
| Uleanya (2017)      | Glucose concentration | Derivation                                                            | General PICU population (only non-cardiac)              | NR                                                    | Mortality                                                                                                                          | aOR: Hypoglycemia (<60mg/dL) with survival: 0.2, 95CI: 0.09-0.47; hyperglycemia (>200mg/dL) with survival: 0.12, 95CI: 0.03-0.51                                                                                                                                                                                                                                                                                                                                                    |
| Wintergerst (2006)  | Glucose concentration | Derivation                                                            | General PICU population (mixed cardiac and non-cardiac) | All glucose levels within PICU stay                   | Mortality, Other (PICU and Hospital LOS)                                                                                           | Other: Maximal glucose > 110mg/dL was associated with longer PICU LOS and hospital LOS. Max glucose also associated increased mortality. Glucose variability also associated with increased mortality.                                                                                                                                                                                                                                                                              |
| Yates (2006)        | Glucose concentration | Other (Associations of various glucose measures and adverse outcomes) | General PICU population (only non-cardiac)              | All glucose measurements during PCICU stay            | Mortality, Organ-specific outcomes/residual morbidity, Other (Composite morbidity related to organ dysfunction; durations of stay) | aOR: 1.48, p=0.002 for duration of hyperglycemia > 126 mg/dL                                                                                                                                                                                                                                                                                                                                                                                                                        |
| Yokochi (2016)      | Glucose concentration | Other (Prediction of acute encephalopathy with biphasic               | General PICU population (only non-cardiac)              | All glucose levels during PICU stay                   | Functional outcomes /residual morbidity                                                                                            | Blood glucose (mg/dl) was higher in AESD group: 244.5 (IQR 14–392, n=18) vs non-AESD group 159 (IQR 13–381, n=193) p <0.01. BG cut-off > 228 mg/dL was a predictor of AESD in the multivariable model with sensitivity of 93% and specificity of 91%.                                                                                                                                                                                                                               |

|                                      |                             |                                                                              |                                                         |                                                                                                                          |                                                                                                    |                                                                                                                                                                                                                                                                                                             |
|--------------------------------------|-----------------------------|------------------------------------------------------------------------------|---------------------------------------------------------|--------------------------------------------------------------------------------------------------------------------------|----------------------------------------------------------------------------------------------------|-------------------------------------------------------------------------------------------------------------------------------------------------------------------------------------------------------------------------------------------------------------------------------------------------------------|
|                                      |                             | seizures and late reduced diffusion (AESD) )                                 |                                                         |                                                                                                                          |                                                                                                    |                                                                                                                                                                                                                                                                                                             |
| Yung (2008)                          | Glucose concentration       | Other (Association of hyperglycemia with PELOD >10 and death)                | General PICU population (mixed cardiac and non-cardiac) | All glucose values during first 14 days or PICU stay                                                                     | Mortality, Outcomes related to MODS, Other (Specifically PELOD >10)                                | aOR: PELOD >10: 3.41 [1.91-6.10]; death: 3.12 [1.26-7.70] [95% CI]                                                                                                                                                                                                                                          |
| Zant (2016)                          | Glucose concentration       | Derivation                                                                   | Other (Liver transplant patients only)                  | Perioperative liver transplant period (Day -1 to Post-op Day 7)                                                          | Mortality, Other (rejection, Infection and re-transplantation)                                     | Other: Univariate analysis for outcomes based on cut-off glucose of 200mg/dL. No difference in all 4 outcomes.                                                                                                                                                                                              |
| <b>B. Thyroid dysfunction (n=18)</b> |                             |                                                                              |                                                         |                                                                                                                          |                                                                                                    |                                                                                                                                                                                                                                                                                                             |
| Aggarwal (2020)                      | Thyroid function evaluation | Other (TSH concentrations in relation to trauma patient characteristics)     | Other (Pediatric trauma patients evaluated in ED)       | At time of ED evaluation                                                                                                 | Other (Outcome was TSH concentrations. Relevant predictors were gender and traumatic brain injury) | aOR: Abnormal TSH: females (odds ratio (OR): 4.95, 95% confidence interval (CI): 2.01, 12.21, p<0.01; moderate to severe TBI, (OR: 8.11, 95% CI: 2.51, 26.16, p<0.001)                                                                                                                                      |
| Anand (1994)                         | Thyroid function evaluation | Derivation                                                                   | General PICU population (only non-cardiac)              | At admission                                                                                                             | Mortality                                                                                          | Other: Statistical test is unclear, but mean T3 on admission was 0.62 +/- 0.63 ng/mL, dropped to 0.13 +/- 0.28 before death, or up to 1.67 +/- 0.75 at discharge (similar to control of 1.90 +/- 0.62. No significant differences with total T4.                                                            |
| Cantinotti (2013)                    | Thyroid function evaluation | Other (Exploration of trends of TSH, fT4, fT3 over the perioperative period) | PCICU population (only cardiac)                         | Perioperative period                                                                                                     | Other (Time to extubation)                                                                         | Other: Patients followed with serial measurements of TSH, fT4, fT3 over the perioperative period. Importantly, all patients received dexamethasone 1 mg/kg, which suppresses TSH, rendering the relevance to sepsis very minimal. Also, the use of these rarely measured fT4 and fT3 are not generalizable. |
| Dagan (2006)                         | Thyroid function evaluation | Other (Descriptive)                                                          | PCICU population (only cardiac)                         | Preoperative, Days 1,3,5,7 and 14 post-op                                                                                | Other (Inotrope requirement)                                                                       | Other: T test: Higher fT4 levels on Day 5 and 7 post-op in patients with minimal inotrope requirement compared to those with high inotrope requirement.                                                                                                                                                     |
| denBrinker (2005)                    | Thyroid function evaluation | Derivation                                                                   | General PICU population (mixed cardiac and non-cardiac) | Day 1 of PICU admission                                                                                                  | Mortality                                                                                          | aOR: For Mortality: 3.7 for every doubling of the Total T3/reverse T3 ratio and 1.4 for every 10 nmol/ liter lower Total T4 level on admission. No 95% CI given                                                                                                                                             |
| El-Ella (2019)                       | Thyroid function evaluation | Derivation                                                                   | General PICU population (mixed cardiac and non-cardiac) | Single blood sample obtained within 24 h of PICU admission for thyroid assessment: non-thyroidal illness syndrome (NTIS) | Mortality                                                                                          | aOR: NTIS independently predicted Mortality (OR = 3.91; 95% CI = 1.006---15.19; P = .0491)                                                                                                                                                                                                                  |

|                    |                                                                                                                                        |                                                                                                              |                                                         |                                                                                                                                                                                                                                                                         |                                                           |                                                                                                                                                                                                                                                                                      |
|--------------------|----------------------------------------------------------------------------------------------------------------------------------------|--------------------------------------------------------------------------------------------------------------|---------------------------------------------------------|-------------------------------------------------------------------------------------------------------------------------------------------------------------------------------------------------------------------------------------------------------------------------|-----------------------------------------------------------|--------------------------------------------------------------------------------------------------------------------------------------------------------------------------------------------------------------------------------------------------------------------------------------|
| Gielen (2012)      | Thyroid function evaluation                                                                                                            | Derivation                                                                                                   | General PICU population (mixed cardiac and non-cardiac) | From day of randomization to Day 3 of PICU admission or PICU discharge if earlier than 3 days                                                                                                                                                                           | Mortality                                                 | aOR: Increase from baseline in T3/rT3 was significantly associated with a lower likelihood for earlier live discharge (HR per unit increase, 0.863; 95% CI, 0.806-0.927; P =0.0001)                                                                                                  |
| Goldsmid (2011)    | Thyroid function evaluation                                                                                                            | Derivation                                                                                                   | Other (Neonates)                                        | At admission                                                                                                                                                                                                                                                            | Mortality                                                 | Other: RR (risk ratio): risk of death for pts with low ( $\leq 2$ SD below nl) T3 & T4 & TSH 10.75 (95CI 3.9-29)                                                                                                                                                                     |
| Gottschlich (2002) | Glucose concentration, Adrenal axis evaluation, Thyroid function evaluation, Other (Glucagon, gastrin, epinephrine, insulin, dopamine) | Other (Descriptive levels of all the hormones of interest)                                                   | General PICU population (only non-cardiac)              | PICU admission and weekly after that                                                                                                                                                                                                                                    | Other (Levels of the hormones)                            | Other: Description of the weekly values of hormones of interest depending on the group assigned to (early or late enteral feeding)                                                                                                                                                   |
| Hebbar (2009)      | Adrenal axis evaluation, Thyroid function evaluation, Other (Other)                                                                    | Other (Incidence of neuroendocrine dysfunction; correlation with severity of illness and presence of sepsis) | General PICU population (only non-cardiac)              | Within 12 hours of PICU admission                                                                                                                                                                                                                                       | Mortality, Other (ICU length of stay, ventilator days)    | Other: Comparisons between septic and non-septic groups                                                                                                                                                                                                                              |
| Jacobs (2019)      | Thyroid function evaluation                                                                                                            | Other (Analysis of correlation of thyroid levels with outcomes)                                              | General PICU population (mixed cardiac and non-cardiac) | NR                                                                                                                                                                                                                                                                      | Mortality, Other (PICU LOS, acquisition of new infection) | aOR: Admission T4 OR for 90d mortality 0.968 [0.953-0.983], $p < 0.0001$ ; with PICU LOS: Beta estimate -0.049 [-6.995-1.032] $p = 0.008$ ; OR with new infection 1.725 [1.095-2.717], $p = 0.01$                                                                                    |
| Marks (2009)       | Thyroid function evaluation                                                                                                            | Other (Investigational)                                                                                      | PCICU population (only cardiac)                         | Preoperatively within 1 wk of surgery, postoperatively upon arrival to the pediatric intensive care unit (PICU), twice daily at 0800 and 2400 h up to and including postoperative day (POD) 3, and at 0800 h from POD 4-7 inclusive if the patient remained in the PICU | Outcomes related to MODS                                  | Other: Correlation: Mixed-effect modeling showed a significant relation between the PELOD scores and the night samples of TSH ( $P = 0.002$ ), TT3 ( $P = 0.0001$ and $0.002$ ), FT3I ( $P = 0.047$ and $0.151$ ), T3U ( $P = 0.007$ ), FT4 ( $P = 0.014$ ), and rT3 ( $P = 0.016$ ) |



|                                      |                             |                                                                                     |                                                         |                                                                                      |                                                                                                                              |                                                                                                                                                                                                                                                                                                                                                                                                                                                                                                                                                                                 |
|--------------------------------------|-----------------------------|-------------------------------------------------------------------------------------|---------------------------------------------------------|--------------------------------------------------------------------------------------|------------------------------------------------------------------------------------------------------------------------------|---------------------------------------------------------------------------------------------------------------------------------------------------------------------------------------------------------------------------------------------------------------------------------------------------------------------------------------------------------------------------------------------------------------------------------------------------------------------------------------------------------------------------------------------------------------------------------|
| Marwali (2019)                       | Thyroid function evaluation | Other (Occurrence of LCOS in relation to T3 supplementation or not)                 | PCICU population (only cardiac)                         | Anytime 6-40 hours post Ao cross clamp release; at 6 hr post Ao cross-clamp release; | Outcomes related to MODS, Other (LCOS, low cardiac output syndrome, time to tracheal extubation, measures of cardiac output) | aOR: Total number of patients exhibiting LCOS at anytime 6 -48 h after Ao cross-clamp removal: significantly higher in placebo group [n = 86 vs. 66, respectively, p < 0.001; OR (95% CI) 0.43 (0.36-0.52)]                                                                                                                                                                                                                                                                                                                                                                     |
| Merchant (2008)                      | Thyroid function evaluation | Other (Investigational)                                                             | PCICU population (only cardiac)                         | Preoperative, and 2, 12, 24, and 48 h after CPB                                      | Other (PICU LOS, IS)                                                                                                         | Other: Correlation: for the outcome of PICU LOS, FT4: r=-0.504, p=0.023; for the outcome of IS on POD1 and POD2, FT4: r=-0.523, p=0.018, and r=-0.495, p=0.027, respectively. No significant correlation between FT4 and ventilation days, FiO2 at 2h, or TISS on POD2                                                                                                                                                                                                                                                                                                          |
| Sayarifard (2018)                    | Thyroid function evaluation | Derivation                                                                          | Other (PICU of unknown composition)                     | Day 1 and 3 of PICU admission                                                        | Mortality                                                                                                                    | Other: p values comparing thyroid function tests of survivors and non-survivors                                                                                                                                                                                                                                                                                                                                                                                                                                                                                                 |
| Suvarna (2009)                       | Thyroid function evaluation | NR                                                                                  | General PICU population (only non-cardiac)              | Admission and pre-discharge                                                          | Mortality                                                                                                                    | Se: ADMISSION: T3 <=46, 88%, T4 <=4.5 63%<br>Sp: ADMISSION: T3 <=46 41%, T4 <=4.5 86%<br>AUROC: Best performing AUROC (0.91) was T3 at @ discharge, Sn 88, Sp 86, with cutoff value <=56.5 ng/dL. T3 on admission AUROC 0.68, cutoff <=46, Sn 88, Sp 41                                                                                                                                                                                                                                                                                                                         |
| Talwar (2012)                        | Thyroid function evaluation | Other (Search for associations between thyroid levels and AUCs with complications.) | PCICU population (only cardiac)                         | Perioperative period                                                                 | Mortality, Other (Inotropic score, duration of ventilation)                                                                  | Other: Demonstrated no cutoffs per se, but showed a significant association between AUC for TT4, FT3, TT3 and inotrope score and duration of ventilation (R2: 3-6%). And significant association between TT4 AUC and survivors vs nonsurvivors. No discussion of steroid exposure.                                                                                                                                                                                                                                                                                              |
| Yildizdas (2004)                     | Thyroid function evaluation | NR                                                                                  | General PICU population (only non-cardiac)              | Not specified, but before dopamine was started, early in course                      | Mortality                                                                                                                    | Other: Anova, Mann-Whitney comparisons b/n sepsis/septic shock, and controls. Sepsis TT3 0.91 +/- 0.22 nmol/L, septic shock 0.64 +/- 0.23, control 2.11 +/- 0.59 P<0.001; survivors 1.00 +/- 0.16, non-survivors 0.58 +/- 0.16, P <0.001                                                                                                                                                                                                                                                                                                                                        |
| <b>C. Adrenal dysfunction (n=22)</b> |                             |                                                                                     |                                                         |                                                                                      |                                                                                                                              |                                                                                                                                                                                                                                                                                                                                                                                                                                                                                                                                                                                 |
| Amstadter (2011)                     | Adrenal axis evaluation     | Derivation                                                                          | Other (Trauma patients)                                 | Once patient was stable. Exact timing unknown.                                       | Functional outcomes /residual morbidity                                                                                      | aOR: Multiple variants for the CRHRI gene were analyzed regarding the risk of PTSD. Therefore, there is no one OR to provide.                                                                                                                                                                                                                                                                                                                                                                                                                                                   |
| Balbao (2014)                        | Adrenal axis evaluation     | Derivation                                                                          | General PICU population (mixed cardiac and non-cardiac) | First 48 hours after admission                                                       | Other (Vasotropic inotropic score)                                                                                           | Se: A salivary cortisol concentration post-ACTH of ≤226 nM (8.2 ug/dl) had a sensitivity of 79% to discriminate need for vasoactive or inotropic support.<br>Sp: A salivary cortisol concentration post-ACTH of ≤226 nM (8.2 ug/dl) had a specificity of 62% to discriminate need for vasoactive or inotropic support.<br>AUROC: A salivary cortisol concentration post-ACTH of ≤226 nM (8.2 ug/dl) had a sensitivity of 79% and a specificity of 62% to discriminate need for vasoactive or inotropic support (area under receiver operating characteristic (ROC) curve 0.74). |
| Bekhit (2019)                        | Adrenal axis evaluation     | Derivation                                                                          | NR                                                      | Early morning fasting, within 24h of admission                                       | Mortality, Other (PRISM III, MV)                                                                                             | Se: At cortisol cutoff of 30.05 mcg/dL, 89.5%<br>Sp: At cortisol cutoff of 30.05 mcg/dL, 64.5%                                                                                                                                                                                                                                                                                                                                                                                                                                                                                  |

|                    |                                                                                                                                        |                                                                                                              |                                            |                                      |                                                           |                                                                                                                                                                                                                                                                                                                                                                                                                                                                                                                                                                                                                                                   |
|--------------------|----------------------------------------------------------------------------------------------------------------------------------------|--------------------------------------------------------------------------------------------------------------|--------------------------------------------|--------------------------------------|-----------------------------------------------------------|---------------------------------------------------------------------------------------------------------------------------------------------------------------------------------------------------------------------------------------------------------------------------------------------------------------------------------------------------------------------------------------------------------------------------------------------------------------------------------------------------------------------------------------------------------------------------------------------------------------------------------------------------|
|                    |                                                                                                                                        |                                                                                                              |                                            |                                      | duration, inotropic support, PICU LOS, PICU Mortality)    | PPV: at cortisol cutoff of 30.05 mcg/dL, 43.6%<br>NPV: At cortisol cutoff of 30.05 mcg/dL, 95.2%<br>AUROC: 0.783, 95CI: 0.673-0.893                                                                                                                                                                                                                                                                                                                                                                                                                                                                                                               |
| Bone (2002)        | Adrenal axis evaluation                                                                                                                | Derivation                                                                                                   | Other (Meningococcal disease)              | On admission                         | Other (Glasgow Meningococcal Septicemic Prognostic Score) | Other: AI was defined as a peak cortisol value on the LDST of < 500 nmol/L or an 8 am cortisol value of <140 nmol/L. Children with a GMSPS of 9 or greater had a significantly higher mean 8 am cortisol value (685 +/- 330 nmol/L) compared with those with a GMSPS of <9, who had a mean 8 am cortisol value of (388 +/- 282 nmol/L; P < .01)                                                                                                                                                                                                                                                                                                   |
| Garcia (2010)      | Adrenal axis evaluation                                                                                                                | Other (Descriptive levels of cortisol after ACTH simulation)                                                 | PICU population (only cardiac)             | Not clearly described                | Other (Cortisol levels)                                   | Other: Cortisol levels after low dose ACTH tests in hemodynamic unstable neonate after cardiac surgery                                                                                                                                                                                                                                                                                                                                                                                                                                                                                                                                            |
| Gottschlich (2002) | Glucose concentration, Adrenal axis evaluation, Thyroid function evaluation, Other (Glucagon, gastrin, epinephrine, insulin, dopamine) | Other (Descriptive levels of all the hormones of interest)                                                   | General PICU population (only non-cardiac) | PICU admission and weekly after that | Other (Levels of the hormones)                            | Other: Description of the weekly values of hormones of interest depending on the group assigned to (early or late enteral feeding)                                                                                                                                                                                                                                                                                                                                                                                                                                                                                                                |
| Hatherill (1999)   | Adrenal axis evaluation                                                                                                                | Derivation                                                                                                   | Other (Septic shock)                       | Immediately after admission          | Mortality, Outcomes related to MODS                       | Other: Insufficiency was defined as a post-Synacthen cortisol increment < 200 nmol/L. Median calculated risk of mortality corrected for age was 17% (range, 7-29%) in adrenal insufficiency compared with 7% (range, 3-22%) in those with adequate adrenal function (p = 0.128). Children with adrenal insufficiency were more likely to require adrenaline or noradrenaline for hemodynamic support (p = 0.032; odds ratio 6.1; 95% confidence interval, 1.2 to 30.1). Application of the vasopressor score (table 4) showed a significant linear trend for them to require a greater vasopressor dose (p = 0.0025; Chi-squared test for trend). |
| Hebbar (2009)      | Adrenal axis evaluation, Thyroid function evaluation, Other (Other)                                                                    | Other (Incidence of neuroendocrine dysfunction; correlation with severity of illness and presence of sepsis) | General PICU population (only non-cardiac) | Within 12 hours of PICU admission    | Mortality, Other (ICU length of stay, ventilator days)    | Other: Comparisons between septic and non-septic groups                                                                                                                                                                                                                                                                                                                                                                                                                                                                                                                                                                                           |
| Levy-Shraga (2016) | Adrenal axis evaluation                                                                                                                | Derivation                                                                                                   | General PICU population (mixed)            | During PICU admission                | Mortality                                                 | Se: Baseline cortisol >= 600 nmol/L and risk of mortality: 0.54<br>Sp: Baseline cortisol >= 600 nmol/L and risk of mortality: 0.70<br>AUROC: Baseline cortisol >= 600 nmol/L and risk of mortality: 0.63                                                                                                                                                                                                                                                                                                                                                                                                                                          |

|                             |                                                               |                                                                                                                 |                                                         |                                                               |                                                                                                                                                                 |                                                                                                                                                                                                                                                 |
|-----------------------------|---------------------------------------------------------------|-----------------------------------------------------------------------------------------------------------------|---------------------------------------------------------|---------------------------------------------------------------|-----------------------------------------------------------------------------------------------------------------------------------------------------------------|-------------------------------------------------------------------------------------------------------------------------------------------------------------------------------------------------------------------------------------------------|
|                             |                                                               |                                                                                                                 | cardiac and non-cardiac)                                |                                                               |                                                                                                                                                                 |                                                                                                                                                                                                                                                 |
| Lichtakowicz-Krynska (2004) | Adrenal axis evaluation, Other (Aldosterone and plasma renin) | Other (Comparison of aldosterone levels between children with meningococcal sepsis and children without sepsis) | General PICU population (only non-cardiac)              | At and during admission at 8 hrly intervals                   | Other (Correlation between aldosterone, plasma renin and cortisol levels between groups as well as correlations with severity of illness and vasopressor score) | Other: Children with meningococcal sepsis had lower aldosterone levels compared to children without sepsis (423.1 +/- 88.5 pg/ml vs 1489.2 +/- 244 pg/ml, p<0.0001); no correlation between aldosterone and plasma renin;                       |
| Menon (2002)                | Adrenal axis evaluation                                       | Other (assessment of adrenal insufficiency (AI) by various criteria)                                            | General PICU population (mixed cardiac and non-cardiac) | Uncertain; at the ~time of defined hemodynamic instability    | Mortality, Other (Occurrence of AI in patients with hemodynamic instability)                                                                                    | Other: % of patients with AI per various definitions                                                                                                                                                                                            |
| Menon (2010)                | Adrenal axis evaluation                                       | Other (Sort of a validation of the low dose cosyntropin stimulation test)                                       | General PICU population (mixed cardiac and non-cardiac) | Day 1 of PICU admission                                       | Other (Prevalence of adrenal insufficiency on admission to the PICU)                                                                                            | Other: At admission, 115 patients (30.2%; 95% CI, 25.9-35.1)                                                                                                                                                                                    |
| Menon (2018)                | Adrenal axis evaluation                                       | Derivation                                                                                                      | General PICU population (mixed cardiac and non-cardiac) | Admission to PICU                                             | Other (Correlation between cortisol levels and severity of illness and vasoactive inotrope scores)                                                              | Other: Baseline free cortisol and total cortisol levels were strongly correlated with baseline PRISM score and moderately correlated with admission VIS. Serum TC levels were highly correlated with FC levels                                  |
| Nichols (2017)              | Adrenal axis evaluation                                       | Validation                                                                                                      | General PICU population (only non-cardiac)              | At consideration of treatment with stress dose hydrocortisone | Mortality, Other (PICU LOS, Hos LOS, Vent-free days, vasopressor-free, Hosp acquired infection, PRISM-III)                                                      | Other: No differences in LOSs, VFDs, VasoFDS, mortality, between rSTC <18 vs ≥18. Log-transformed rSTC modestly positively correlated with PRISM III @ 12h: r=0.3932; r <sup>2</sup> = 0.16, p<0.001                                            |
| Pizarro (2005)              | Adrenal axis evaluation                                       | Derivation                                                                                                      | General PICU population (only non-cardiac)              | First 24 hrs after diagnosis of septic shock                  | Mortality, Other (Shock states - fluid responsive, fluid refractory and catecholamine refractory)                                                               | Other: All children with fluid responsive shock had corticotropin response > 9 mcg/dL (p < 0.05); corticotropin response < 9 mcg/dL was independent predictor of septic shock (p<0.05); no association of adrenal responsiveness with mortality |

|                         |                         |            |                                            |                                                                                    |                                                                            |                                                                                                                                                                                                                                                                                                                                                                                                                                        |
|-------------------------|-------------------------|------------|--------------------------------------------|------------------------------------------------------------------------------------|----------------------------------------------------------------------------|----------------------------------------------------------------------------------------------------------------------------------------------------------------------------------------------------------------------------------------------------------------------------------------------------------------------------------------------------------------------------------------------------------------------------------------|
| Samransamruajkit (2007) | Adrenal axis evaluation | Validation | General PICU population (only non-cardiac) | Within 24h of ICU admission                                                        | Mortality, Other (PRISM III)                                               | Other: According to definition of basal cortisol < 15,2 mcg/dL (415 nmol/L) n=4; or increment ≤9 mcg/dL (250 nmol/L) n=6. No difference in mortality. AI group had higher PRISM III 8.3 v 5.6 (p<0.05).                                                                                                                                                                                                                                |
| Sarhi (2007)            | Adrenal axis evaluation | Derivation | General PICU population (only non-cardiac) | "Soon after a dx of fluid refractory septic shock was made"                        | Mortality                                                                  | Se: Ranged 50-88% depending on increment of cortisol, with 1 mcg stim<br>Sp: Ranged 59-95% depending on increment of cortisol, with 1 mcg stim<br>AUROC: Good performance of 60 min stim: <8 sn 75, sp 82. Peak cort increase <7 sn 63, sp 100<br>Other: Basal cortisols were 48 mcg/dL (39-67) in rel AI pts, and 115 (62-157) in nl adrenal reserve, P=0.015. Basal was 69 (49-82) in survivors, 73 (40-122) in nonsurvivors, P=0.52 |
| Sasser (2012)           | Adrenal axis evaluation | Validation | PCICU population (only cardiac)            | "Immediate postoperative period"                                                   | Mortality, Organ-specific outcomes/residual morbidity                      | Other: Correlation analysis was performed between immediate postop cortisol and numerous outcomes. Significant correlations were HIGHER cortisol with HIGHER lactate and SaO2-SvO2 difference, max inotrope score, therefore higher cortisol correlates with SOI. Low cortisol was not associated with worse outcomes in this postop cardiac cohort.                                                                                   |
| Singhi (2006)           | Adrenal axis evaluation | Derivation | Other (ED meningitis patients)             | At presentation                                                                    | Outcomes related to MODS                                                   | aOR: Cortisol > 42 had OR 9.8 (95CI: 1.7-55; P=0.01 for hearing or neurologic sequelae<br>Other: Median cortisol in those with neuro sequelae 45 (90CI: 11-89), compared to those without 30 (4-62); P=0.43.                                                                                                                                                                                                                           |
| van den Akker (2009)    | Adrenal axis evaluation | NR         | NR                                         | NR                                                                                 | NR                                                                         | NR                                                                                                                                                                                                                                                                                                                                                                                                                                     |
| Verweij (2012)          | Adrenal axis evaluation | Validation | PCICU population (only cardiac)            | Not specified - prior to hydrocortisone therapy, which was median 36h (16-156 hrs) | Other (Response to hydrocortisone therapy for low cardiac output syndrome) | Other: Analysis using mixed models ANOVA showed no difference between groups (cortisol <3.6 mcg/dL vs >3.6 mcg/dL) in response to hydrocortisone therapy for LCOS as measured by lactate, BP changes, glucose changes, renal failure, time to extubation or ICU LOS.                                                                                                                                                                   |
| Yehya (2016)            | Adrenal axis evaluation | Validation | General PICU population (only non-cardiac) | Measurement of random cortisol before starting hydrocortisone therapy              | Mortality, Other (VFD)                                                     | Other: Correlation of cortisol with PRISM-III: r2 0.11, P=0.001; correlation cortisol with vasopressor score: r2 = 0.07, p=0.001; Pts with cort ≥18 treated with hydrocortisone had higher PRISM-III (P=0.006) and higher vasopressor scores (P<0.001)                                                                                                                                                                                 |

Abbreviations: aOR, adjusted odds ratio; AUROC, area under the receiver operating characteristics curve; LR, likelihood ratio; NPV, negative predictive value; PPV, positive predictive value; Se, sensitivity; Sp, specificity; PICU, pediatric intensive care unit; PCICU, pediatric cardiac intensive care unit

## References:

1. Agbenyega T, Angus BJ, Bedu-Addo G, et al. Glucose and lactate kinetics in children with severe malaria. *J Clin Endocrinol Metab* 2000; 85: 1569-76.
2. Aggarwal S, Fogel J, Kumar K, et al. Trauma and thyroid-stimulating abnormalities in pediatric patients. *Trauma* 2020; 22: 118-25.
3. Alaei F, Davari PN, Alaei M, et al. Postoperative outcome for hyperglycemic pediatric cardiac surgery patients. *Pediatr Cardiol* 2012; 33: 21-6.
4. Al-Mofadda SM, Nassar A, Al-Turki A, et al. Pediatric near drowning: the experience of King Khalid University Hospital. *Ann Saudi Med* 2001; 21: 300-3.
5. Amstadter AB, Nugent NR, Yang BZ et al. Corticotrophin-releasing hormone type 1 receptor gene (CRHR1) variants predict posttraumatic stress disorder onset and course in pediatric injury patients. *Dis Markers* 2011; 30: 89-99.
6. Anand NK, Chandra V, Sinha RS, et al. Evaluation of thyroid functions in critically ill infants. *Indian Pediatr* 1994; 31: 1233-7.
7. Aşlıoğlu N, Turna F, Paksu MS. Admission hyperglycemia is a reliable outcome predictor in children with severe traumatic brain injury. *J Pediatr (Rio J)* 2011; 87: 325-8.
8. Babbitt CJ, Halpern R, Liao E, et al. Hyperglycemia is associated with intracranial injury in children younger than 3 years of age. *Pediatr Emerg Care* 2013; 29: 279-82.
9. Bahloul M, Ben Hamida C, Chelly H, et al. Severe head injury among children: prognostic factors and outcome. *Injury* 2009; 40: 535-40.
10. Balbao VM, Costa MM, Castro M, et al. Evaluation of adrenal function in critically ill children. *Clin Endocrinol (Oxf)* 2014; 81: 559-65.
11. Ballweg JA, Ittenbach RF, Bernbaum J, et al. Hyperglycaemia after Stage I palliation does not adversely affect neurodevelopmental outcome at 1 year of age in patients with single-ventricle physiology. *Eur J Cardiothorac Surg* 2009; 36: 688-93.
12. Ballweg JA, Wernovsky G, Ittenbach RF, et al. Hyperglycemia after infant cardiac surgery does not adversely impact neurodevelopmental outcome. *Ann Thorac Surg* 2007; 84: 2052-8.
13. Bekhit OE, Mohamed SA, Yousef RM, et al. Relation between baseline total serum cortisol level and outcome in pediatric intensive care unit. *Sci Rep* 2019; 9: 6008.
14. Bhutia TD, Lodha R, Kabra SK. Abnormalities in glucose homeostasis in critically ill children. *Pediatr Crit Care Med* 2013; 14: e16-25.
15. Bone M, Diver M, Selby A, et al. Assessment of adrenal function in the initial phase of meningococcal disease. *Pediatrics* 2002; 110: 563-9.
16. Branco RG, Garcia PC, Piva JP, et al. Glucose level and risk of mortality in pediatric septic shock. *Pediatr Crit Care Med* 2005; 6: 470-2.
17. Burns CM, Rutherford MA, Boardman JP, et al. Patterns of cerebral injury and neurodevelopmental outcomes after symptomatic neonatal hypoglycemia. *Pediatrics* 2008; 122: 65-74.
18. Cantinotti M, Lorenzoni V, Storti S, et al. Thyroid and brain natriuretic peptide response in children undergoing cardiac surgery for congenital heart disease- age-related variations and prognostic value. *Circ J* 2013; 77: 188-97.
19. Chiaretti A, De Benedictis R, Langer A, et al. Prognostic implications of hyperglycaemia in paediatric head injury. *Childs Nerv Syst* 1998; 14: 455-9.
20. Chiaretti A, Piastra M, Pulitanò S, et al. Prognostic factors and outcome of children with severe head injury: an 8-year experience. *Childs Nerv Syst* 2002; 18: 129-36.

21. Chisti MJ, Ahmed T, Bardhan PK, et al. Evaluation of simple laboratory investigations to predict fatal outcome in infants with severe malnutrition presenting in an urban diarrhoea treatment centre in Bangladesh. *Trop Med Int Health* 2010; 15: 1322-5.
22. Chisti MJ, Saha S, Roy CN, et al. Predictors of bacteremia in infants with diarrhea and systemic inflammatory response syndrome attending an urban diarrheal treatment center in a developing country. *Pediatr Crit Care Med* 2010; 11: 92-7.
23. Chong SL, Harjanto S, Testoni D, et al. Early hyperglycemia in pediatric traumatic brain injury predicts for mortality, prolonged duration of mechanical ventilation, and intensive care stay. *Int J Endocrinol* 2015; 2015: 719476.
24. Cochran A, Scaife ER, Hansen KW, et al. Hyperglycemia and outcomes from pediatric traumatic brain injury. *J Trauma* 2003; 55: 1035-8.
25. Dagan O, Vidne B, Josefsberg Z, et al. Relationship between changes in thyroid hormone level and severity of the postoperative course in neonates undergoing open-heart surgery. *Paediatr Anaesth* 2006; 16: 538-42.
26. Day KM, Haub N, Betts H, Inwald DP. Hyperglycemia is associated with morbidity in critically ill children with meningococcal sepsis. *Pediatr Crit Care Med* 2008; 9: 636-40.
27. de Ferranti S, Gauvreau K, Hickey PR, et al. Intraoperative hyperglycemia during infant cardiac surgery is not associated with adverse neurodevelopmental outcomes at 1, 4, and 8 years. *Anesthesiology* 2004; 100: 1345-52.
28. DeCampi WM, Olsen MC, Munro HM, et al. Perioperative hyperglycemia: effect on outcome after infant congenital heart surgery. *Ann Thorac Surg* 2010; 89: 181-5.
29. den Brinker M, Joosten KF, Visser TJ, et al. Euthyroid sick syndrome in meningococcal sepsis: the impact of peripheral thyroid hormone metabolism and binding proteins. *J Clin Endocrinol Metab* 2005; 90: 5613-20.
30. Egi M, Morimatsu H, Toda Y, et al. Hyperglycemia and the outcome of pediatric cardiac surgery patients requiring peritoneal dialysis. *Int J Artif Organs* 2008; 31: 309-16.
31. El-Ella SSA, El-Mekkawy MS, El-Dihemey MA. Prevalence and prognostic value of non-thyroidal illness syndrome among critically ill children. *An Pediatr (Barc)* 2019; 90: 237-43.
32. El-Sherbini SA, Marzouk H, El-Sayed R, et al. Etiology of hyperglycemia in critically ill children and the impact of organ dysfunction. *Rev Bras Ter Intensiva* 2018; 30: 286-293.
33. Falcao G, Ulate K, Kouzekanani K, et al. Impact of postoperative hyperglycemia following surgical repair of congenital cardiac defects. *Pediatr Cardiol* 2008; 29: 628-36.
34. Faustino EV, Apkon M. Persistent hyperglycemia in critically ill children. *J Pediatr* 2005; 146: 30-4.
35. Faustino EVS, Hirshberg EL, Asaro LA, et al. Short-term adverse outcomes associated with hypoglycemia in critically ill children. *Crit Care Med* 2019; 47: 706-14.
36. Filho NO, Alves RL, Fernandes AT, et al. Association of increased morbidity with the occurrence of hyperglycemia in the immediate postoperative period after elective pediatric neurosurgery. *J Neurosurg Pediatr* 2016; 17: 625-9.
37. Fu YQ, Bai K, Liu CJ. The impact of admission serum lactate on children with moderate to severe traumatic brain injury. *PLoS One* 2019; 14: e0222591.
38. Fu YQ, Chong SL, Lee JH, et al. The impact of early hyperglycaemia on children with traumatic brain injury. *Brain Inj* 2017; 31: 396-400.
39. Garcia X, Bhutta AT, Dyamenahalli U, et al. Adrenal insufficiency in hemodynamically unstable neonates after open-heart surgery. *Congenit Heart Dis* 2010; 5: 422-9.

40. Ghafoori AF, Twite MD, Friesen RH. Postoperative hyperglycemia is associated with mediastinitis following pediatric cardiac surgery. *Paediatr Anaesth* 2008; 18: 1202-7.
41. Gielen M, Mesotten D, Wouters PJ, et al. Effect of tight glucose control with insulin on the thyroid axis of critically ill children and its relation with outcome. *J Clin Endocrinol Metab.* 2012; 97: 3569-76.
42. Goldsmit GS, Valdes M, Herzovich V, Rodriguez S, et al. Evaluation and clinical application of changes in thyroid hormone and TSH levels in critically ill full-term newborns. *J Perinat Med* 2011; 39: 59-64.
43. Gottschlich MM, Jenkins ME, Mayes T, et al. The 2002 Clinical Research Award. An evaluation of the safety of early vs delayed enteral support and effects on clinical, nutritional, and endocrine outcomes after severe burns. *J Burn Care Rehabil* 2002; 23: 401-15.
44. Graf WD, Cummings P, Quan L, et al. Predicting outcome in pediatric submersion victims. *Ann Emerg Med* 1995; 26: 312-9.
45. Hale AT, Pekala K, Theobald B, et al. Predictors of post-discharge seizures in children with traumatic brain injury. *Childs Nerv Syst* 2018; 34: 1361-5.
46. Hatherill M, Tibby SM, Hilliard T, et al. Adrenal insufficiency in septic shock. *Arch Dis Child* 1999; 80: 51-5.
47. Hebbar, Kiran et al. Neuroendocrine dysfunction in pediatric critical illness. *Pediatr Crit Care Med* 2009; 10: 35-40.
48. Hirshberg E, Larsen G, Van Duker H. Alterations in glucose homeostasis in the pediatric intensive care unit: Hyperglycemia and glucose variability are associated with increased mortality and morbidity. *Pediatr Crit Care Med* 2008; 9: 361-6.
49. Hu GH, Duan L, Jiang M, et al. Wider intraoperative glycemic fluctuation increases risk of acute kidney injury after pediatric cardiac surgery. *Ren Fail* 2018; 40: 611-617.
50. Hu GW, Lang HL, Guo H, et al. A risk score based on admission characteristics to predict progressive hemorrhagic injury from traumatic brain injury in children. *Eur J Pediatr* 2017; 176: 689-696.
51. Huang XZ, Wang H, Xu HZ, et al. Association between perioperative glucose levels and adverse outcomes in infants receiving open-heart surgery with cardiopulmonary bypass for congenital heart disease. *Anaesth Intensive Care* 2012; 40: 789-94.
52. Ichikawa R, Maeda Y, Shibuya A, et al. Prediction of poor prognosis after severe head injury in children using logistic regression. *Pediatr Emerg Care* 2018; 34: 825-831.
53. Jacobs A, Derese I, Vander Perre S, et al. Non-thyroidal illness syndrome in critically ill children: prognostic value and impact of nutritional management. *Thyroid* 2019; 29: 480-92.
54. Jallow M, Casals-Pascual C, Ackerman H, et al. Clinical features of severe malaria associated with death: a 13-year observational study in the Gambia. *PLoS One* 2012; 7: e45645.
55. Jeschke MG, Gauglitz GG, Finnerty CC, et al. Survivors versus nonsurvivors postburn: differences in inflammatory and hypermetabolic trajectories. *Ann Surg* 2014; 259: 814-23.
56. Jeschke MG, Kraft R, Emdad F, et al. Glucose control in severely thermally injured pediatric patients: what glucose range should be the target? *Ann Surg* 2010; 252: 521-7;
57. Kan CH, Saffari M, Khoo TH. Prognostic factors of severe traumatic brain injury outcome in children aged 2-16 years at a major neurosurgical referral centre. *Malays J Med Sci* 2009; 16: 25-33.
58. Khajavi L, Khademi G, Mehramiz M, et al. Association of dysglycemia with mortality in children receiving parenteral nutrition in pediatric intensive care unit. *Turk J Pediatr* 2018; 60: 134-141.
59. Khan SA, Ibrahim MN, Anwar-ul-Haq. Frequency and mortality associated with hyperglycemia in critically ill children. *J Coll Physicians Surg Pak* 2015; 25: 878-81.

60. Klein GW, Hojsak JM, Schmeidler J, et al. Hyperglycemia and outcome in the pediatric intensive care unit. *J Pediatr* 2008; 153: 379-84.
61. Kraft R, Herndon DN, Mlcak RP, et al. Bacterial respiratory tract infections are promoted by systemic hyperglycemia after severe burn injury in pediatric patients. *Burns* 2014; 40: 428-35.
62. Krueger JJ, Brotschi B, Balmer C, et al. Postoperative hyperglycemia and 4-year neurodevelopmental outcome in children operated for congenital heart disease. *J Pediatr* 2015; 167: 1253-8.e1.
63. Kyle UG, Coss Bu JA, Kennedy CE, et al. Organ dysfunction is associated with hyperglycemia in critically ill children. *Intensive Care Med* 2010; 36: 312-20.
64. Lee CC, Lu X, Xiao Z, et al. Prognostic value of B-type natriuretic peptide, leukocytosis, and hyperglycemia in children with severe hand, foot, and mouth disease. *Shock* 2016; 45: 620-5.
65. Leite HP, de Lima LF, de Oliveira Iglesias SB, et al. Malnutrition may worsen the prognosis of critically ill children with hyperglycemia and hypoglycemia. *JPEN J Parenter Enteral Nutr* 2013; 37: 335-41.
66. Levy-Shraga Y, Pinhas-Hamiel O, Molina-Hazan V et al. Elevated baseline cortisol levels are predictive of bad outcomes in critically ill children. *Pediatr Emerg Care* 2018; 34: 613-7.
67. Li Y, Bai Z, Li M, et al. U-shaped relationship between early blood glucose and mortality in critically ill children. *BMC Pediatr* 2015; 15: 88.
68. Lichtarowicz-Krynska EJ, Cole TJ, Camacho-Hubner C, et al. Circulating aldosterone levels are unexpectedly low in children with acute meningococcal disease. *J Clin Endocrinol Metab.* 2004; 89: 1410-4.
69. Lodha R, Bhutia TD, Kabra SK, et al. Day 1 blood glucose and outcome in critically ill children. *Indian Pediatr* 2009; 46: 809-10.
70. Maegaki Y, Kurozawa Y, Tamasaki A, et al. Early predictors of status epilepticus-associated mortality and morbidity in children. *Brain Dev.* 2015; 37: 478-86.
71. Thabet Mahmoud A, Tawfik MAM, Abd El Naby SA, et al. Neurophysiological study of critical illness polyneuropathy and myopathy in mechanically ventilated children; additional aspects in paediatric critical illness comorbidities. *Eur J Neurol.* 2018; 25: 991-e76.
72. Marks SD, Haines C, Rebeyka IM, et al. Hypothalamic-pituitary-thyroid axis changes in children after cardiac surgery. *J Clin Endocrinol Metab.* 2009; 94: 2781-6.
73. Marsillio LE, Ginsburg SL, Rosenbaum CH, et al. Hyperglycemia at the time of acquiring central catheter-associated bloodstream infections is associated with mortality in critically ill children. *Pediatr Crit Care Med* 2015; 16: 621-8.
74. Marton E, Mazzucco M, Nascimben E, et al. Severe head injury in early infancy: analysis of causes and possible predictive factors for outcome. *Childs Nerv Syst.* 2007; 23: 873-80.
75. Marwali EM, Caesa P, Darmaputri S, et al. Oral triiodothyronine supplementation decreases low cardiac output syndrome after pediatric cardiac surgery. *Pediatr Cardiol* 2019; 40: 1238-46.
76. Melo JR, Di Rocco F, Lemos-Júnior LP, et al. Defenestration in children younger than 6 years old: mortality predictors in severe head trauma. *Childs Nerv Syst.* 2009; 25: 1077-83.
77. Melo JR, Di Rocco F, Blanot S, et al. Acute hyperglycemia is a reliable outcome predictor in children with severe traumatic brain injury. *Acta Neurochir (Wien).* 2010; 152: 1559-65.
78. Menon K, McNally D, Acharya A, et al. Random serum free cortisol and total cortisol measurements in pediatric septic shock. *J Pediatr Endocrinol Metab* 2018; 31: 757-62.



79. Menon K, Ward RE, Lawson ML, et al. A prospective multicenter study of adrenal function in critically ill children. *Am J Respir Crit Care Med* 2010; 182: 246-51.
80. Menon KCC. Adrenal function in pediatric critical illness. *Pediatr Crit Care Med* 2002; 3: 112-6.
81. Merchant S, Nadaraj S, Chowdhury D, et al. Macrophage migration inhibitory factor in pediatric patients undergoing surgery for congenital heart repair. *Mol Med*. 2008; 14: 124-30.
82. Moga MA, Manlihot C, Marwali EM, et al. Hyperglycemia after pediatric cardiac surgery: impact of age and residual lesions. *Crit Care Med* 2011; 39: 266-72.
83. Nagao T, Morishima T, Kimura H, et al. Prognostic factors in influenza-associated encephalopathy. *Pediatr Infect Dis J*. 2008; 27: 384-9.
84. Narci A, Solak O, Turhan-Haktanir N, et al. The prognostic importance of trauma scoring systems in pediatric patients. *Pediatr Surg Int*. 2009; 25: 25-30.
85. Nayak PP, Davies P, Narendran P, et al. Early change in blood glucose concentration is an indicator of mortality in critically ill children. *Intensive Care Med* 2013; 39: 123-8.
86. Nichols B, Kubis S, Hewlett J, et al. Hydrocortisone therapy in catecholamine-resistant pediatric septic shock: a pragmatic analysis of clinician practice and association with outcomes. *Pediatr Crit Care Med* 2017; 18: e406-e414.
87. O'Brien JE Jr, Marshall JA, Tarrants ML, et al. Intraoperative hyperglycemia and postoperative bacteremia in the pediatric cardiac surgery patient. *Ann Thorac Surg* 2010; 89: 578-83.
88. Ödek Ç, Kendirli T, Yıldırım-Yıldız N, et al. Perioperative factors associated with hyperglycemia after pediatric cardiac surgery and impact of hyperglycemia on morbidity and mortality. *Turk J Pediatr* 2018; 60: 497-505.
89. Ognibene KL, Vawdrey DK, Biagas KV. The association of age, illness severity, and glycemic status in a pediatric intensive care unit. *Pediatr Crit Care Med* 2011; 12: e386-90.
90. Paret G, Tirosch R, Lotan D, et al. Early prediction of neurological outcome after falls in children: metabolic and clinical markers. *J Accid Emerg Med*. 1999; 16: 186-8.
91. Piastra M, Pizza A, Tosi F, et al. Validation of the glycemic stress index in pediatric neurosurgical intensive care. *Neurocrit Care* 2017; 26: 388-92.
92. Pizarro CF, Troster EJ, Damiani D, et al. Absolute and relative adrenal insufficiency in children with septic shock. *Crit Care Med* 2005; 33: 855-9.
93. Plubrukarn R, Tamsamran S. Predicting outcome in pediatric near-drowning. *J Med Assoc Thai*. 2003; 86 Suppl 3:S501-9.
94. Polito A, Thiagarajan RR, Laussen PC, et al. Association between intraoperative and early postoperative glucose levels and adverse outcomes after complex congenital heart surgery. *Circulation* 2008; 118: 2235-42.
95. Preissig CM, Rigby MR. Pediatric critical illness hyperglycemia: risk factors associated with development and severity of hyperglycemia in critically ill children. *J Pediatr* 2009; 155: 734-9.
96. Rake AJ, Srinivasan V, Nadkarni V, et al. Glucose variability and survival in critically ill children: allostasis or harm? *Pediatr Crit Care Med* 2010; 11: 707-12.
97. Rhine T, Wade SL, Makoroff KL, et al. Clinical predictors of outcome following inflicted traumatic brain injury in children. *J Trauma Acute Care Surg* 2012; 73(4 Suppl 3): S248-53.
98. Samransamruajkit R, Jitchaiwat S, Deerojanawong J, et al. Adrenal insufficiency in early phase of pediatric acute lung injury/acute respiratory distress syndrome. *J Crit Care* 2007; 22: 314-8.

99. Sarthi M, Lodha R, Vivekanandhan S, et al. Adrenal status in children with septic shock using low-dose stimulation test. *Pediatr Crit Care Med* 2007; 8: 23-8.
100. Sasser WC, Robert SM, Carlo WF et al. Postoperative serum cortisol concentration and adrenal insufficiency in neonates undergoing open-heart surgery. *World J Pediatr Congenit Heart Surg* 2012; 3: 214-20.
101. Sayarifard F, Yaghmaie B, Sayarifard A, et al. Thyroid function tests in critically ill children; Any correlation with disease severity or outcome?, *Iran J Pediatr* 2018; 28: e69397.
102. Seyed Saadat SM, Bidabadi E, Seyed Saadat SN, et al. Association of persistent hyperglycemia with outcome of severe traumatic brain injury in pediatric population. *Childs Nerv Syst* 2012; 28: 1773-7.
103. Singhi SC. Adrenal insufficiency of critical illness. *Indian Pediatr* 2002; 9: 1011-6.
104. Lou S, Ding F, Long C, et al. Effects of peri-operative glucose levels on adverse outcomes in infants receiving open-heart surgery for congenital heart disease with cardiopulmonary bypass. *Perfusion*. 2011; 26: 133-9.
105. Srinivasan V, Spinella PC, Drott HR, et al. Association of timing, duration, and intensity of hyperglycemia with intensive care unit mortality in critically ill children. *Pediatr Crit Care Med* 2004; 5: 329-36.
106. Suvarna JC, Fande CN. Serum thyroid hormone profile in critically ill children. *Indian J Pediatr*. 2009; 76: 1217-21.
107. Tala JA, Silva CT, Pemira S, et al. Blood glucose as a marker of venous thromboembolism in critically ill children. *J Thromb Haemost* 2014; 12: 891-6.
108. Talwar S, Khadgawat R, Sandeep JA, et al. Cardiopulmonary bypass and serum thyroid hormone profile in pediatric patients with congenital heart disease. *Congenit Heart Dis* 2012; 7: 433-40.
109. Toro-Polo LM, Ortiz-Lozada RY, Chang-Grozo SL, et al. Glycemia upon admission and mortality in a pediatric intensive care unit. *Rev Bras Ter Intensiva* 2018; 30: 471-8.
110. Tude Melo JR, Rocco FD, Blanot S, et al. Mortality in children with severe head trauma: predictive factors and proposal for a new predictive scale. *Neurosurgery* 2010; 67: 1542-1547.
111. Ulate KP, Lima Falcao GC, Bielefeld MR, et al. Strict glycemic targets need not be so strict: a more permissive glycemic range for critically ill children. *Pediatrics* 2008; 122: e898-904.
112. Uleanya ND, Aniwada EC, Nwokoye IC, et al. Relationship between glycemic levels and treatment outcome among critically ill children admitted into emergency room in Enugu. *BMC Pediatr* 2017; 17: 126.
113. van den Akker EL, Koper JW, Joosten K, et al. Glucocorticoid receptor mRNA levels are selectively decreased in neutrophils of children with sepsis. *Intensive Care Med* 2009; 35: 1247-54.
114. Verweij EJ, Hogenbirk K, Roest AA, et al. Serum cortisol concentration with exploratory cut-off values do not predict the effects of hydrocortisone administration in children with low cardiac output after cardiac surgery. *Interact Cardiovasc Thorac Surg* 2012; 15: 685-9.
115. Wintergerst KA, Buckingham B, Gandrud L, et al. Association of hypoglycemia, hyperglycemia, and glucose variability with morbidity and death in the pediatric intensive care unit. *Pediatrics* 2006; 118: 173-9.
116. Yates AR, Dyke PC 2nd, Taeed R, et al. Hyperglycemia is a marker for poor outcome in the postoperative pediatric cardiac patient. *Pediatr Crit Care Med* 2006; 7: 351-5.
117. Yehya N, Vogiatzi MG, Thomas NJ, et al. Cortisol correlates with severity of illness and poorly reflects adrenal function in pediatric acute respiratory distress syndrome. *J Pediatr* 2016; 177: 212-8.

118. Yildizdaş D, Onenli-Mungan N, Yapicioğlu H, et al. Thyroid hormone levels and their relationship to survival in children with bacterial sepsis and septic shock. *J Pediatr Endocrinol Metab* 2004; 17: 1435-42.
119. Yokochi T, Takeuchi T, Mukai J, et al. Prediction of acute encephalopathy with biphasic seizures and late reduced diffusion in patients with febrile status epilepticus. *Brain Dev.* 2016; 38: 217-24.
120. Yung M, Wilkins B, Norton L, et al. Glucose control, organ failure, and mortality in pediatric intensive care. *Pediatr Crit Care Med* 2008; 9: 147-52.
121. Zant R, Melter M, Beck D, et al. Glucose metabolism and associated outcome after pediatric liver transplantation. *Transplant Proc* 2016; 48: 2709-2713.

## **Research Priorities**

1. We recommend directing future research into utility of glycosylated hemoglobin (HgbA1c), plasma fructosamine or glycated albumin as potential biomarkers of abnormal glucose homeostasis in critically ill children.
2. We recommend future research priorities into markers of adrenal axis function at the cellular level to further define the axis in critically ill children.
3. Future studies of copeptin as an index of ADH production may enable improved characterization of posterior pituitary function as part of a clinically relevant scoring system.
